# Supplementary material for: An integrated bioinformatic investigation of focal adhesion-related genes in glioma followed by preliminary validation of COL1A2 in tumorigenesis
Source: Aging (Albany NY). 2023 Jun 22;15(13):6225–54. doi: 10.18632/aging.204834 (PMC10373961; doi:10.18632/aging.204834)
Supplement: Supplementary Table 2 [file aging-15-204834-s003.xlsx]

## Sheet: Sheet1
Supplementary Table 2. 199 focal adhesion-related genes.
Gene Symbol	Gene Description
AKT3	AKT serine/threonine kinase 3
PAK4	p21 (RAC1) activated kinase 4
LAMC3	laminin subunit gamma 3
MYL12B	myosin light chain 12B
MYL9	myosin light chain 9
VAV3	vav guanine nucleotide exchange factor 3
MYL12A	myosin light chain 12A
CHAD	chondroadherin
COL1A1	collagen type I alpha 1 chain
COL1A2	collagen type I alpha 2 chain
COL2A1	collagen type II alpha 1 chain
COL3A1	collagen type III alpha 1 chain
COL4A1	collagen type IV alpha 1 chain
COL4A2	collagen type IV alpha 2 chain
COL4A4	collagen type IV alpha 4 chain
COL4A6	collagen type IV alpha 6 chain
COL5A1	collagen type V alpha 1 chain
COL5A2	collagen type V alpha 2 chain
COL6A1	collagen type VI alpha 1 chain
COL6A2	collagen type VI alpha 2 chain
COL6A3	collagen type VI alpha 3 chain
COL11A1	collagen type XI alpha 1 chain
COL11A2	collagen type XI alpha 2 chain
COMP	cartilage oligomeric matrix protein
COL6A6	collagen type VI alpha 6 chain
CRK	CRK proto-oncogene, adaptor protein
CRKL	CRK like proto-oncogene, adaptor protein
CTNNB1	catenin beta 1
DIAPH1	diaphanous related formin 1
DOCK1	dedicator of cytokinesis 1
EGF	epidermal growth factor
EGFR	epidermal growth factor receptor
ELK1	ETS transcription factor ELK1
ERBB2	erb-b2 receptor tyrosine kinase 2
AKT1	AKT serine/threonine kinase 1
AKT2	AKT serine/threonine kinase 2
VEGFD	vascular endothelial growth factor D
LAMB4	laminin subunit beta 4
ITGA11	integrin subunit alpha 11
FLNA	filamin A
FLNB	filamin B
FLNC	filamin C
FLT1	fms related receptor tyrosine kinase 1
FLT4	fms related receptor tyrosine kinase 4
FN1	fibronectin 1
PIP5K1C	phosphatidylinositol-4-phosphate 5-kinase type 1 gamma
PIK3R5	phosphoinositide-3-kinase regulatory subunit 5
FYN	FYN proto-oncogene, Src family tyrosine kinase
SHC2	SHC adaptor protein 2
LAMA1	laminin subunit alpha 1
GRB2	growth factor receptor bound protein 2
RAPGEF1	Rap guanine nucleotide exchange factor 1
ARHGAP35	Rho GTPase activating protein 35
GSK3B	glycogen synthase kinase 3 beta
PARVB	parvin beta
MYLPF	myosin light chain, phosphorylatable, fast skeletal muscle
HGF	hepatocyte growth factor.
HRAS	HRas proto-oncogene, GTPase
BIRC2	baculoviral IAP repeat containing 2
BIRC3	baculoviral IAP repeat containing 3
XIAP	X-linked inhibitor of apoptosis
TNC	tenascin C
IBSP	integrin binding sialoprotein
IGF1	insulin like growth factor 1
IGF1R	insulin like growth factor 1 receptor
ILK	integrin linked kinase
ITGA6	integrin subunit alpha 6
ITGA1	integrin subunit alpha 1
ITGA2	integrin subunit alpha 2
ITGA2B	integrin subunit alpha 2b
ITGA3	integrin subunit alpha 3
ITGA4	integrin subunit alpha 4
ITGA5	integrin subunit alpha 5
ITGA7	integrin subunit alpha 7
ITGA9	integrin subunit alpha 9
ITGAV	integrin subunit alpha V
ITGB1	integrin subunit beta 1
ITGB3	integrin subunit beta 3
ITGB4	integrin subunit beta 4
ITGB5	integrin subunit beta 5
ITGB6	integrin subunit beta 6
ITGB7	integrin subunit beta 7
ITGB8	integrin subunit beta 8
JUN	Jun proto-oncogene, AP-1 transcription factor subunit
KDR	kinase insert domain receptor
RHOA	ras homolog family member A
LAMA2	laminin subunit alpha 2
LAMA3	laminin subunit alpha 3
LAMA4	laminin subunit alpha 4
LAMA5	laminin subunit alpha 5
LAMB1	laminin subunit beta 1
LAMB2	laminin subunit beta 2
LAMB3	laminin subunit beta 3
LAMC1	laminin subunit gamma 1
LAMC2	laminin subunit gamma 2
ARHGAP5	Rho GTPase activating protein 5
SHC4	SHC adaptor protein 4
MET	MET proto-oncogene, receptor tyrosine kinase
MYL2	myosin light chain 2
MYL5	myosin light chain 5
MYLK	myosin light chain kinase
PPP1R12A	protein phosphatase 1 regulatory subunit 12A
COL5A3	collagen type V alpha 3 chain
PAK1	p21 (RAC1) activated kinase 1
PAK2	p21 (RAC1) activated kinase 2
PAK3	p21 (RAC1) activated kinase 3
PDGFA	platelet derived growth factor subunit A
PDGFB	platelet derived growth factor subunit B
PDGFRA	platelet derived growth factor receptor alpha
PDGFRB	platelet derived growth factor receptor beta
PDPK1	3-phosphoinositide dependent protein kinase 1
PGF	placental growth factor
PIK3CA	phosphatidylinositol-4,5-bisphosphate 3-kinase catalytic subunit alpha
PIK3CB	phosphatidylinositol-4,5-bisphosphate 3-kinase catalytic subunit beta
PIK3CD	phosphatidylinositol-4,5-bisphosphate 3-kinase catalytic subunit delta
PIK3CG	phosphatidylinositol-4,5-bisphosphate 3-kinase catalytic subunit gamma
PIK3R1	phosphoinositide-3-kinase regulatory subunit 1
PIK3R2	phosphoinositide-3-kinase regulatory subunit 2
SHC3	SHC adaptor protein 3
PPP1CA	protein phosphatase 1 catalytic subunit alpha
PPP1CB	protein phosphatase 1 catalytic subunit beta
PPP1CC	protein phosphatase 1 catalytic subunit gamma
PARVA	parvin alpha
PRKCA	protein kinase C alpha
PRKCB	protein kinase C beta
PRKCG	protein kinase C gamma
MAPK1	mitogen-activated protein kinase 1
MAPK3	mitogen-activated protein kinase 3
MAPK8	mitogen-activated protein kinase 8
MAPK9	mitogen-activated protein kinase 9
MAPK10	mitogen-activated protein kinase 10
PDGFC	platelet derived growth factor C
MAP2K1	mitogen-activated protein kinase kinase 1
RELN	reelin
PAK6	p21 (RAC1) activated kinase 6
PAK5	p21 (RAC1) activated kinase 5
BAD	BCL2 associated agonist of cell death
PTEN	phosphatase and tensin homolog
PTK2	protein tyrosine kinase 2
PXN	paxillin
MYL7	myosin light chain 7
RAC1	Rac family small GTPase 1
RAC2	Rac family small GTPase 2
RAC3	Rac family small GTPase 3
RAF1	Raf-1 proto-oncogene, serine/threonine kinase
RAP1A	RAP1A, member of RAS oncogene family
RAP1B	RAP1B, member of RAS oncogene family
RASGRF1	Ras protein specific guanine nucleotide releasing factor 1
CCND1	cyclin D1
BCL2	BCL2 apoptosis regulator
ACTB	actin beta
ROCK1	Rho associated coiled-coil containing protein kinase 1
TNN	tenascin N
PARVG	parvin gamma
SHC1	SHC adaptor protein 1
SOS1	SOS Ras/Rac guanine nucleotide exchange factor 1
SOS2	SOS Ras/Rho guanine nucleotide exchange factor 2
SPP1	secreted phosphoprotein 1
SRC	SRC proto-oncogene, non-receptor tyrosine kinase
BRAF	B-Raf proto-oncogene, serine/threonine kinase
THBS1	thrombospondin 1
THBS2	thrombospondin 2
THBS3	thrombospondin 3
THBS4	thrombospondin 4
TLN1	talin 1
ACTG1	actin gamma 1
TNR	tenascin R
TNXB	tenascin XB
VASP	vasodilator stimulated phosphoprotein
VAV1	vav guanine nucleotide exchange factor 1
VAV2	vav guanine nucleotide exchange factor 2
VCL	vinculin
VEGFA	vascular endothelial growth factor A
VEGFB	vascular endothelial growth factor B
VEGFC	vascular endothelial growth factor C
VTN	vitronectin
VWF	von Willebrand factor
ZYX	zyxin
PDGFD	platelet derived growth factor D
ACTN4	actinin alpha 4
CAPN2	calpain 2
TLN2	talin 2
PIK3R3	phosphoinositide-3-kinase regulatory subunit 3
ITGA10	integrin subunit alpha 10
ITGA8	integrin subunit alpha 8
MYLK2	myosin light chain kinase 2
CAV1	caveolin 1
CAV2	caveolin 2
CAV3	caveolin 3
ACTN1	actinin alpha 1
ACTN2	actinin alpha 2
ACTN3	actinin alpha 3 (gene/pseudogene)
CCND2	cyclin D2
CCND3	cyclin D3
MYLK3	myosin light chain kinase 3
MYL10	myosin light chain 10
ROCK2	Rho associated coiled-coil containing protein kinase 2
BCAR1	BCAR1 scaffold protein, Cas family member
CDC42	cell division cycle 42
