# Supplementary material for: An integrated bioinformatic investigation of focal adhesion-related genes in glioma followed by preliminary validation of COL1A2 in tumorigenesis
Source: Aging (Albany NY). 2023 Jun 22;15(13):6225–54. doi: 10.18632/aging.204834 (PMC10373961; doi:10.18632/aging.204834)
Supplement: Supplementary Table 3 [file aging-15-204834-s004.xlsx]

## Sheet: Sheet1
Supplementary Table 3. Difference in the enrichment of KEGG pathways between FARG1 and FARG2 subtypes.
id	logFC	AveExpr	t	P.Value	adj.P.Val	B
KEGG_TERPENOID_BACKBONE_BIOSYNTHESIS	-0.387491	-0.00831407	-25.5741	1.29266e-124	7.27124e-124	273.605
KEGG_LONG_TERM_POTENTIATION	-0.254451	-0.0034665	-23.3522	1.55277e-106	7.76387e-106	232.058
KEGG_BUTANOATE_METABOLISM	-0.244393	0.00683055	-22.4232	3.02059e-99	1.2357e-98	215.311
KEGG_PROPANOATE_METABOLISM	-0.238031	0.00394628	-20.816	4.70712e-87	1.72915e-86	187.304
KEGG_PROXIMAL_TUBULE_BICARBONATE_RECLAMATION	-0.233904	0.0061419	-17.4609	1.53127e-63	4.24043e-63	133.326
KEGG_LONG_TERM_DEPRESSION	-0.223313	0.00871592	-23.142	7.15922e-105	3.39121e-104	228.235
KEGG_TASTE_TRANSDUCTION	-0.219652	0.0130989	-21.5517	1.44509e-92	5.53438e-92	199.967
KEGG_CARDIAC_MUSCLE_CONTRACTION	-0.213861	-0.0029764	-17.4136	3.13147e-63	8.54036e-63	132.613
KEGG_ALANINE_ASPARTATE_AND_GLUTAMATE_METABOLISM	-0.197934	0.00288959	-20.1841	2.04441e-82	6.94329e-82	176.654
KEGG_PHOSPHATIDYLINOSITOL_SIGNALING_SYSTEM	-0.193032	-0.00363208	-18.0842	1.07795e-67	3.07986e-67	142.855
KEGG_NEUROACTIVE_LIGAND_RECEPTOR_INTERACTION	-0.191925	0.0115272	-18.4748	2.39075e-70	7.41956e-70	148.947
KEGG_BIOSYNTHESIS_OF_UNSATURATED_FATTY_ACIDS	-0.183295	0.0122477	-15.6578	3.88102e-52	9.56964e-52	107.168
KEGG_INOSITOL_PHOSPHATE_METABOLISM	-0.170975	-0.000866346	-18.1957	1.90214e-68	5.52235e-68	144.584
KEGG_WNT_SIGNALING_PATHWAY	-0.170898	0.00368968	-22.1402	4.64575e-97	1.8583e-96	210.287
KEGG_CALCIUM_SIGNALING_PATHWAY	-0.169992	-0.000824457	-16.4191	7.70913e-57	2.01108e-56	117.951
KEGG_GLYOXYLATE_AND_DICARBOXYLATE_METABOLISM	-0.167379	0.00435575	-15.4109	1.19317e-50	2.86362e-50	103.757
KEGG_RIBOSOME	-0.16647	0.0195815	-8.0256	1.72931e-15	2.75466e-15	23.4106
KEGG_BETA_ALANINE_METABOLISM	-0.149367	0.0118458	-15.444	7.56328e-51	1.83972e-50	104.211
KEGG_LYSINE_DEGRADATION	-0.141444	0.000811603	-14.8171	3.80456e-47	8.56026e-47	95.7264
KEGG_PYRUVATE_METABOLISM	-0.140741	0.00566021	-13.8426	1.23588e-41	2.68023e-41	83.0987
KEGG_STEROID_HORMONE_BIOSYNTHESIS	-0.138445	0.00983849	-11.953	7.89745e-32	1.61539e-31	60.6584
KEGG_OLFACTORY_TRANSDUCTION	-0.135979	0.0113978	-11.3941	3.67251e-29	7.2643e-29	54.5615
KEGG_AMYOTROPHIC_LATERAL_SCLEROSIS_ALS	-0.131976	-0.00233438	-15.8696	1.98445e-53	5.03101e-53	110.129
KEGG_STEROID_BIOSYNTHESIS	-0.121663	-0.00391859	-7.83601	7.58926e-15	1.1983e-14	21.9542
KEGG_MELANOGENESIS	-0.1148	0.00056046	-15.2441	1.17915e-49	2.79273e-49	101.477
KEGG_GLYCEROLIPID_METABOLISM	-0.107638	5.92796e-05	-14.8876	1.47886e-47	3.41276e-47	96.6669
KEGG_VALINE_LEUCINE_AND_ISOLEUCINE_DEGRADATION	-0.106555	0.00587303	-9.42545	1.17103e-20	2.06652e-20	35.1608
KEGG_ERBB_SIGNALING_PATHWAY	-0.103564	-0.000977216	-11.2601	1.54137e-28	3.01572e-28	53.1383
KEGG_DORSO_VENTRAL_AXIS_FORMATION	-0.100199	0.00340217	-8.75519	4.33297e-18	7.42794e-18	29.3172
KEGG_SELENOAMINO_ACID_METABOLISM	-0.0974087	-0.00322226	-10.3665	1.513e-24	2.80763e-24	44.0247
KEGG_TYPE_II_DIABETES_MELLITUS	-0.0922194	-0.00510169	-8.68777	7.68638e-18	1.30523e-17	28.7514
KEGG_ALDOSTERONE_REGULATED_SODIUM_REABSORPTION	-0.0904047	0.00317583	-8.19952	4.3293e-16	7.0843e-16	24.7751
KEGG_CITRATE_CYCLE_TCA_CYCLE	-0.0901597	-0.000539882	-6.88635	7.69663e-12	1.09952e-11	15.1547
KEGG_FATTY_ACID_METABOLISM	-0.0879801	0.00684938	-8.2283	3.43361e-16	5.67018e-16	25.0036
KEGG_HEDGEHOG_SIGNALING_PATHWAY	-0.0865934	0.00902233	-10.3689	1.47657e-24	2.76857e-24	44.0488
KEGG_OXIDATIVE_PHOSPHORYLATION	-0.0823571	0.00383796	-5.36615	9.00302e-08	1.16643e-07	6.02162
KEGG_GNRH_SIGNALING_PATHWAY	-0.0815401	-0.00378199	-9.70822	8.59923e-22	1.5635e-21	37.7441
KEGG_VASOPRESSIN_REGULATED_WATER_REABSORPTION	-0.0725099	-0.00177001	-8.03908	1.55482e-15	2.49881e-15	23.5153
KEGG_GAP_JUNCTION	-0.0706409	0.000483041	-7.52801	7.83159e-14	1.20486e-13	19.6582
KEGG_MTOR_SIGNALING_PATHWAY	-0.0691681	-0.0081635	-7.64998	3.13958e-14	4.87176e-14	20.5571
KEGG_TIGHT_JUNCTION	-0.0581217	0.00349338	-9.26861	4.83864e-20	8.45588e-20	33.7579
KEGG_ALZHEIMERS_DISEASE	-0.0539376	-0.00326534	-5.36606	9.00747e-08	1.16643e-07	6.02114
KEGG_ENDOMETRIAL_CANCER	-0.0536851	-0.00186079	-5.23365	1.84106e-07	2.36708e-07	5.32947
KEGG_THYROID_CANCER	-0.0509273	0.000962817	-5.64304	1.91571e-08	2.57334e-08	7.52222
KEGG_GLYCEROPHOSPHOLIPID_METABOLISM	-0.050762	-0.00213757	-7.29637	4.28354e-13	6.53421e-13	17.9886
KEGG_HISTIDINE_METABOLISM	-0.0506163	0.00744236	-5.20365	2.15984e-07	2.75724e-07	5.17511
KEGG_PARKINSONS_DISEASE	-0.0497225	0.00722545	-3.32889	0.000888178	0.00103813	-2.74445
KEGG_BASAL_CELL_CARCINOMA	-0.0492674	0.00232502	-5.58239	2.70507e-08	3.60676e-08	7.18726
KEGG_NITROGEN_METABOLISM	-0.0477962	0.0147514	-4.25752	2.16538e-05	2.72565e-05	0.751345
KEGG_METABOLISM_OF_XENOBIOTICS_BY_CYTOCHROME_P450	-0.0447455	0.0150915	-3.49416	0.000486183	0.000587335	-2.18405
KEGG_GLYCINE_SERINE_AND_THREONINE_METABOLISM	-0.043651	0.0066729	-4.11884	3.96716e-05	4.95895e-05	0.175789
KEGG_NON_HOMOLOGOUS_END_JOINING	-0.0426325	-0.0163056	-2.83716	0.00459875	0.00523908	-4.25285
KEGG_RETINOL_METABOLISM	-0.0389998	0.0160026	-3.84264	0.000125618	0.000154871	-0.914647
KEGG_HUNTINGTONS_DISEASE	-0.0364078	0.000449895	-3.53308	0.000420325	0.000511207	-2.0482
KEGG_REGULATION_OF_AUTOPHAGY	-0.034639	-0.00355608	-3.43794	0.000598483	0.000718179	-2.37769
KEGG_NOTCH_SIGNALING_PATHWAY	-0.0299653	-0.0032365	-2.86112	0.00426658	0.00489161	-4.18489
KEGG_BASAL_TRANSCRIPTION_FACTORS	-0.0267757	-0.00793734	-2.33029	0.0198924	0.0221026	-5.55777
KEGG_VASCULAR_SMOOTH_MUSCLE_CONTRACTION	-0.0265909	-0.00174608	-3.32957	0.000886021	0.00103813	-2.74219
KEGG_ADIPOCYTOKINE_SIGNALING_PATHWAY	-0.0257032	0.00156488	-3.12993	0.00177444	0.00204743	-3.38348
KEGG_LINOLEIC_ACID_METABOLISM	-0.0235854	0.0245684	-2.06137	0.0394006	0.0429824	-6.14674
KEGG_OOCYTE_MEIOSIS	-0.0231162	-0.00611997	-2.81063	0.00499392	0.00565349	-4.32746
KEGG_AXON_GUIDANCE	-0.0223337	-0.00555409	-2.70144	0.00696395	0.00783444	-4.62719
KEGG_ENDOCYTOSIS	-0.0222989	-0.00350567	-3.43408	0.000607024	0.000723605	-2.39088
KEGG_ABC_TRANSPORTERS	-0.0182656	0.00424773	-2.03425	0.0420614	0.0454214	-6.20214
KEGG_MAPK_SIGNALING_PATHWAY	-0.0140203	-0.00202157	-2.10743	0.0352075	0.0386423	-6.05095
KEGG_GLIOMA	0.0176805	0.000338283	2.03347	0.0421409	0.0454214	-6.20374
KEGG_FC_EPSILON_RI_SIGNALING_PATHWAY	0.0195596	0.00506294	2.23316	0.0256518	0.0283271	-5.77879
KEGG_DILATED_CARDIOMYOPATHY	0.0199256	-0.00179911	2.35687	0.0185281	0.0207146	-5.49566
KEGG_INSULIN_SIGNALING_PATHWAY	0.0235881	-0.00305526	3.21527	0.00132456	0.0015382	-3.11414
KEGG_UBIQUITIN_MEDIATED_PROTEOLYSIS	0.0331005	-0.00816594	3.60236	0.000323249	0.000395816	-1.80265
KEGG_GLYCOSAMINOGLYCAN_BIOSYNTHESIS_HEPARAN_SULFATE	0.0391704	0.000172554	3.86877	0.000112985	0.000140258	-0.814701
KEGG_PURINE_METABOLISM	0.0392425	-0.00796524	6.97341	4.22155e-12	6.22852e-12	15.7434
KEGG_SNARE_INTERACTIONS_IN_VESICULAR_TRANSPORT	0.0420559	-0.00100515	5.10487	3.63281e-07	4.60498e-07	4.67289
KEGG_AMINOACYL_TRNA_BIOSYNTHESIS	0.045384	-0.0243801	3.36995	0.000766487	0.000907682	-2.60773
KEGG_NEUROTROPHIN_SIGNALING_PATHWAY	0.0464152	-0.000750175	5.4006	7.45489e-08	9.79475e-08	6.20436
KEGG_MELANOMA	0.0469378	0.00276833	6.78038	1.58401e-11	2.24506e-11	14.4476
KEGG_PEROXISOME	0.0489431	0.000369054	5.45535	5.51129e-08	7.29435e-08	6.49705
KEGG_TRYPTOPHAN_METABOLISM	0.0545461	0.00970281	5.95453	3.08674e-09	4.24132e-09	9.29751
KEGG_PPAR_SIGNALING_PATHWAY	0.0557332	0.00969919	5.88507	4.67365e-09	6.37316e-09	8.89368
KEGG_COLORECTAL_CANCER	0.058824	-0.00419449	5.72425	1.20051e-08	1.62476e-08	7.97621
KEGG_ACUTE_MYELOID_LEUKEMIA	0.0605222	-0.00661271	6.90294	6.86799e-12	9.8899e-12	15.2664
KEGG_VIBRIO_CHOLERAE_INFECTION	0.063023	0.00136997	7.25769	5.66215e-13	8.49323e-13	17.7146
KEGG_HYPERTROPHIC_CARDIOMYOPATHY_HCM	0.0643323	-0.00167465	8.1432	6.79906e-16	1.10255e-15	24.3303
KEGG_TYROSINE_METABOLISM	0.0659597	0.0020415	6.91191	6.45725e-12	9.37343e-12	15.3268
KEGG_FRUCTOSE_AND_MANNOSE_METABOLISM	0.0667394	-0.00143319	7.2594	5.59287e-13	8.4598e-13	17.7267
KEGG_MATURITY_ONSET_DIABETES_OF_THE_YOUNG	0.0677442	0.0101257	6.12852	1.07081e-09	1.48266e-09	10.3292
KEGG_VEGF_SIGNALING_PATHWAY	0.0700775	0.000973984	9.51589	5.11767e-21	9.21181e-21	35.9795
KEGG_CHRONIC_MYELOID_LEUKEMIA	0.071909	-0.00303586	6.93684	5.43781e-12	7.95777e-12	15.4952
KEGG_ARGININE_AND_PROLINE_METABOLISM	0.072215	0.00637171	7.69979	2.15318e-14	3.37019e-14	20.9281
KEGG_EPITHELIAL_CELL_SIGNALING_IN_HELICOBACTER_PYLORI_INFECTION	0.0791076	-0.000121846	10.7533	3.07028e-26	5.87925e-26	47.8875
KEGG_ARACHIDONIC_ACID_METABOLISM	0.0794333	0.00821454	7.15241	1.20172e-12	1.78768e-12	16.9759
KEGG_SULFUR_METABOLISM	0.0815046	-0.00508476	6.3277	3.0796e-10	4.29712e-10	11.5453
KEGG_O_GLYCAN_BIOSYNTHESIS	0.0868048	0.00169629	8.42146	7.11103e-17	1.19625e-16	26.5561
KEGG_ETHER_LIPID_METABOLISM	0.0890034	0.00478041	9.03199	3.95148e-19	6.83909e-19	31.6824
KEGG_PRIMARY_BILE_ACID_BIOSYNTHESIS	0.0901175	0.00629799	6.39088	2.05841e-10	2.89464e-10	11.9388
KEGG_ADHERENS_JUNCTION	0.0930237	-0.00170839	9.50121	5.85676e-21	1.04378e-20	35.846
KEGG_ARRHYTHMOGENIC_RIGHT_VENTRICULAR_CARDIOMYOPATHY_ARVC	0.0977023	-0.0019675	11.4596	1.81061e-29	3.62121e-29	55.2633
KEGG_DRUG_METABOLISM_OTHER_ENZYMES	0.100162	-0.00289694	10.5909	1.60077e-25	3.03304e-25	46.2506
KEGG_RIBOFLAVIN_METABOLISM	0.102186	-0.00900706	10.0831	2.42687e-23	4.45751e-23	41.2758
KEGG_PROSTATE_CANCER	0.102399	-0.00344547	12.7551	7.6144e-36	1.59371e-35	69.8442
KEGG_GLYCOSPHINGOLIPID_BIOSYNTHESIS_GANGLIO_SERIES	0.103281	-0.0170164	8.41247	7.65755e-17	1.27626e-16	26.4831
KEGG_RENAL_CELL_CARCINOMA	0.1119	-0.00356595	11.1252	6.44109e-28	1.24666e-27	51.7196
KEGG_PATHWAYS_IN_CANCER	0.129944	-0.00200215	20.1493	3.65649e-82	1.21883e-81	176.074
KEGG_GLYCOSAMINOGLYCAN_BIOSYNTHESIS_CHONDROITIN_SULFATE	0.140293	-0.0102156	12.8283	3.19351e-36	6.84323e-36	70.7077
KEGG_PRION_DISEASES	0.140617	0.00252069	14.8361	2.95007e-47	6.72169e-47	95.9796
KEGG_PYRIMIDINE_METABOLISM	0.141917	-0.0129153	14.754	8.83325e-47	1.96294e-46	94.8881
KEGG_PORPHYRIN_AND_CHLOROPHYLL_METABOLISM	0.143099	-0.0110388	12.7844	5.3787e-36	1.13902e-35	70.1896
KEGG_CHEMOKINE_SIGNALING_PATHWAY	0.146971	0.000181321	18.2621	6.73455e-69	1.98724e-68	145.619
KEGG_NUCLEOTIDE_EXCISION_REPAIR	0.1488	-0.0115802	12.4382	3.12415e-34	6.46376e-34	66.1535
KEGG_GLYCOSYLPHOSPHATIDYLINOSITOL_GPI_ANCHOR_BIOSYNTHESIS	0.153883	-0.0145504	14.583	8.54226e-46	1.87513e-45	92.6298
KEGG_GLYCOLYSIS_GLUCONEOGENESIS	0.153938	0.00365555	15.8436	2.86429e-53	7.16071e-53	109.764
KEGG_BASE_EXCISION_REPAIR	0.156906	-0.0141757	11.6456	2.38799e-30	4.82964e-30	57.2739
KEGG_FC_GAMMA_R_MEDIATED_PHAGOCYTOSIS	0.171637	0.000121087	17.0569	6.61003e-61	1.77583e-60	127.28
KEGG_RIG_I_LIKE_RECEPTOR_SIGNALING_PATHWAY	0.171928	-0.0117997	22.0066	4.93177e-96	1.92982e-95	207.93
KEGG_PANCREATIC_CANCER	0.172203	-0.00132879	18.5684	5.45084e-71	1.72132e-70	150.421
KEGG_REGULATION_OF_ACTIN_CYTOSKELETON	0.176703	-0.00154755	25.2427	7.26353e-122	3.96193e-121	267.286
KEGG_T_CELL_RECEPTOR_SIGNALING_PATHWAY	0.177716	-0.00681202	20.6158	1.41971e-85	5.11096e-85	183.907
KEGG_B_CELL_RECEPTOR_SIGNALING_PATHWAY	0.19188	-0.00380477	19.1798	3.07729e-75	1.00711e-74	160.173
KEGG_NOD_LIKE_RECEPTOR_SIGNALING_PATHWAY	0.192494	-0.00467155	18.7916	1.57193e-72	5.05265e-72	153.956
KEGG_BLADDER_CANCER	0.192573	-0.00341858	24.4011	5.80786e-115	3.07475e-114	251.422
KEGG_NICOTINATE_AND_NICOTINAMIDE_METABOLISM	0.19366	-0.00955095	22.5469	3.3087e-100	1.41801e-99	217.518
KEGG_PENTOSE_PHOSPHATE_PATHWAY	0.201037	-0.00133114	20.606	1.67437e-85	5.90955e-85	183.742
KEGG_CELL_CYCLE	0.204832	-0.015301	16.849	1.43925e-59	3.80977e-59	124.211
KEGG_PROTEIN_EXPORT	0.221	0.0120534	15.0273	2.25233e-48	5.2652e-48	98.5402
KEGG_PANTOTHENATE_AND_COA_BIOSYNTHESIS	0.225907	-0.00474588	22.4297	2.6917e-99	1.12676e-98	215.426
KEGG_GLYCOSPHINGOLIPID_BIOSYNTHESIS_GLOBO_SERIES	0.228498	-0.017616	20.8307	3.66201e-87	1.37325e-86	187.555
KEGG_HOMOLOGOUS_RECOMBINATION	0.228954	-0.0157405	16.0865	9.16277e-55	2.35614e-54	113.192
KEGG_SMALL_CELL_LUNG_CANCER	0.236551	-0.0101615	28.9564	1.28323e-153	1.00426e-152	340.272
KEGG_PHENYLALANINE_METABOLISM	0.236876	0.00529727	18.2864	4.60784e-69	1.38235e-68	145.998
KEGG_RENIN_ANGIOTENSIN_SYSTEM	0.239985	-0.00533719	20.2229	1.06696e-82	3.69333e-82	177.302
KEGG_CYTOSOLIC_DNA_SENSING_PATHWAY	0.249717	-0.0100277	22.7498	8.64909e-102	3.99189e-101	221.154
KEGG_APOPTOSIS	0.250493	-0.0087709	30.3999	1.92935e-166	2.04284e-165	369.752
KEGG_NATURAL_KILLER_CELL_MEDIATED_CYTOTOXICITY	0.250652	-0.00554991	27.4609	1.34546e-140	9.3147e-140	310.341
KEGG_CELL_ADHESION_MOLECULES_CAMS	0.253306	-0.00308093	26.6789	6.56314e-134	4.07368e-133	294.967
KEGG_GLUTATHIONE_METABOLISM	0.265905	-0.00069847	24.1862	3.21001e-113	1.65086e-112	247.418
KEGG_P53_SIGNALING_PATHWAY	0.269232	-0.00959421	30.2741	2.58395e-165	2.32555e-164	367.162
KEGG_FOCAL_ADHESION	0.283404	-0.0097698	36.5484	3.91762e-223	1.76293e-221	500.109
KEGG_TOLL_LIKE_RECEPTOR_SIGNALING_PATHWAY	0.28414	-0.00794991	27.9989	3.00906e-145	2.16652e-144	321.031
KEGG_GALACTOSE_METABOLISM	0.28524	0.00238579	30.4938	2.77779e-167	3.12502e-166	371.688
KEGG_PROTEASOME	0.289198	-0.00769213	18.4081	6.82301e-70	2.0816e-69	147.901
KEGG_LEUKOCYTE_TRANSENDOTHELIAL_MIGRATION	0.290951	-0.00341328	33.7024	1.51327e-196	3.89127e-195	438.973
KEGG_JAK_STAT_SIGNALING_PATHWAY	0.295649	-0.00885039	31.9027	5.07376e-180	7.61064e-179	400.975
KEGG_DNA_REPLICATION	0.296743	-0.0306101	17.7482	1.92237e-65	5.40665e-65	137.689
KEGG_LYSOSOME	0.299852	-0.0115538	30.279	2.33749e-165	2.21446e-164	367.262
KEGG_VIRAL_MYOCARDITIS	0.302402	-0.00290576	30.3107	1.21659e-165	1.21659e-164	367.914
KEGG_STARCH_AND_SUCROSE_METABOLISM	0.310195	-0.000641941	33.8979	2.3457e-198	7.03711e-197	443.134
KEGG_TYPE_I_DIABETES_MELLITUS	0.32269	-1.28676e-05	23.1725	4.10775e-105	1.99837e-104	228.79
KEGG_PATHOGENIC_ESCHERICHIA_COLI_INFECTION	0.329149	-0.00199773	31.8231	2.69246e-179	3.72802e-178	399.309
KEGG_CYTOKINE_CYTOKINE_RECEPTOR_INTERACTION	0.332309	-0.00825516	30.6268	1.77488e-168	2.12985e-167	374.434
KEGG_HEMATOPOIETIC_CELL_LINEAGE	0.33524	-0.00618058	27.0058	1.07548e-136	6.91377e-136	301.37
KEGG_OTHER_GLYCAN_DEGRADATION	0.338514	-0.0254338	25.8318	9.11524e-127	5.29272e-126	278.55
KEGG_MISMATCH_REPAIR	0.346671	-0.0272482	22.6325	7.1319e-101	3.20936e-100	219.049
KEGG_PRIMARY_IMMUNODEFICIENCY	0.363628	-0.0150151	26.1401	2.35897e-129	1.41538e-128	284.496
KEGG_AMINO_SUGAR_AND_NUCLEOTIDE_SUGAR_METABOLISM	0.370281	-0.0161945	38.0841	1.18655e-237	7.11929e-236	533.496
KEGG_GLYCOSAMINOGLYCAN_BIOSYNTHESIS_KERATAN_SULFATE	0.382689	-0.00957351	31.9939	7.48174e-181	1.22429e-179	402.887
KEGG_GLYCOSAMINOGLYCAN_DEGRADATION	0.386645	-0.0206529	30.1758	1.95502e-164	1.67573e-163	365.141
KEGG_ASTHMA	0.387114	-0.00430364	22.6086	1.09408e-100	4.80327e-100	218.622
KEGG_N_GLYCAN_BIOSYNTHESIS	0.391755	-0.0246046	40.6344	6.12908e-262	5.51618e-260	589.346
KEGG_INTESTINAL_IMMUNE_NETWORK_FOR_IGA_PRODUCTION	0.403061	-0.00845533	27.0336	6.22035e-137	4.1469e-136	301.916
KEGG_LEISHMANIA_INFECTION	0.40359	-0.0070603	32.1114	6.34192e-182	1.14154e-180	405.351
KEGG_ANTIGEN_PROCESSING_AND_PRESENTATION	0.405663	-0.00489056	32.6245	1.28639e-186	2.57277e-185	416.141
KEGG_ECM_RECEPTOR_INTERACTION	0.425424	-0.012125	42.7687	2.30184e-282	4.14332e-280	636.317
KEGG_COMPLEMENT_AND_COAGULATION_CASCADES	0.441449	-0.00567922	36.2234	4.48936e-220	1.61617e-218	493.074
KEGG_SYSTEMIC_LUPUS_ERYTHEMATOSUS	0.447409	-0.00374691	32.7317	1.33649e-187	3.00711e-186	418.403
KEGG_AUTOIMMUNE_THYROID_DISEASE	0.460696	-0.009599	28.5931	1.98592e-150	1.48944e-149	332.94
KEGG_ALLOGRAFT_REJECTION	0.496213	-0.00915175	29.7046	3.10055e-160	2.53681e-159	355.484
KEGG_GRAFT_VERSUS_HOST_DISEASE	0.537787	-0.00983365	31.5945	3.22192e-177	4.14247e-176	394.531
