# Supplementary material for: An integrated bioinformatic investigation of focal adhesion-related genes in glioma followed by preliminary validation of COL1A2 in tumorigenesis
Source: Aging (Albany NY). 2023 Jun 22;15(13):6225–54. doi: 10.18632/aging.204834 (PMC10373961; doi:10.18632/aging.204834)
Supplement: Supplementary Table 4 [file aging-15-204834-s005.xlsx]

## Sheet: Sheet1
Supplementary Table 4. Difference in the content of immune cells between different subtypes.
Name	TCGA-RY-A840-01	TCGA-P5-A733-01	TCGA-HW-A5KJ-01	TCGA-FG-8185-01	TCGA-DB-A64X-01	TCGA-WH-A86K-01	TCGA-HT-A619-01	TCGA-TM-A84M-01	TCGA-P5-A77W-01	TCGA-S9-A6TW-01	TCGA-R8-A73M-01	TCGA-HW-A5KL-01	TCGA-DU-7018-01	TCGA-TM-A7C5-01	TCGA-HT-7692-01	TCGA-TM-A84G-01	TCGA-CS-6667-01	TCGA-DU-7014-01	TCGA-FG-A4MX-01	TCGA-DB-A4XH-01	TCGA-DB-A4XG-01	TCGA-QH-A65X-01	TCGA-FG-6690-01	TCGA-HT-7608-01	TCGA-VW-A7QS-01	TCGA-P5-A77X-01	TCGA-E1-A7Z4-01	TCGA-E1-5318-01	TCGA-DU-6410-01	TCGA-RY-A847-01	TCGA-QH-A6X3-01	TCGA-WY-A85A-01	TCGA-DU-8164-01	TCGA-TM-A84H-01	TCGA-QH-A6CZ-01	TCGA-DH-A66F-01	TCGA-S9-A7R3-01	TCGA-FG-A6IZ-01	TCGA-E1-A7Z6-01	TCGA-HT-8108-01	TCGA-QH-A870-01	TCGA-P5-A737-01	TCGA-S9-A7J2-01	TCGA-DU-5874-01	TCGA-RY-A83Y-01	TCGA-P5-A72X-01	TCGA-DB-A64R-01	TCGA-RY-A845-01	TCGA-DU-7306-01
B cell_TIMER***	-1.09784	-1.09525	-1.58489	-0.691668	-1.22636	-0.583831	-0.91469	-1.22585	-0.990983	-1.27814	-1.0221	-0.222343	-0.942002	-0.757576	-0.824062	-0.817909	-0.370743	-0.801905	-0.849986	-1.01908	-0.830291	-1.33278	0.508941	-0.339568	-1.29149	-0.916427	0.480801	-0.482503	-0.778614	-0.340323	-0.255429	-0.0463244	-0.658165	-0.268146	-0.708195	-1.3567	-0.145027	-1.33483	-0.156496	0.785366	0.194516	-0.727664	-0.924684	-0.827416	-0.670655	-1.17621	-0.947082	-0.355837	-0.515435
T cell CD4+_TIMER***	-0.651059	-0.885803	-0.904878	-0.440002	-0.826418	-0.245603	-0.868314	-0.88289	-0.742314	-0.739162	-0.605933	0.449561	-1.03873	-0.787464	-0.389406	-0.806977	-0.215128	-0.583268	-0.217042	-1.15528	-1.04489	-0.34755	0.475234	-0.693317	-0.677168	-0.835337	1.15675	-0.505641	-0.991942	0.535424	-0.714831	-0.321928	-1.04678	0.304596	-0.882198	-0.755209	0.148736	-0.193873	0.831595	0.605619	-0.221011	-0.00576111	-0.495036	-0.756904	-0.185154	0.108529	-0.991725	0.102642	-0.24139
T cell CD8+_TIMER***	-1.45946	-0.165917	-0.678616	-0.47034	-0.554403	-0.923098	-0.746626	-0.886064	-0.885024	-0.277225	-1.51109	-1.46652	-0.612761	-1.05878	-1.2642	-0.759667	-0.117519	0.225063	-1.32747	-0.500412	-0.558295	-0.894488	-0.879815	-0.656539	-0.770206	-0.364178	-1.6758	-0.488604	-1.07818	-1.6758	-0.423886	-0.577772	-0.260599	-0.639138	-0.487998	-0.34176	-0.0517522	-1.6758	-0.75993	-0.21711	-0.398218	-1.6758	-1.05336	-0.866306	-1.44763	-0.302321	-0.46531	-1.06705	0.213735
Neutrophil_TIMER***	-1.20659	-1.10596	-1.53334	-1.023	-0.940485	-1.09305	-1.33038	-1.0192	-1.33442	-1.11319	-1.30781	-0.533572	-1.21237	-1.16603	-0.990139	-1.18604	-0.627621	-0.597934	-1.15875	-1.06821	-1.04176	-1.33931	-0.0202116	-0.739956	-1.27628	-0.986267	-0.33619	-0.873264	-1.28875	-0.34156	-0.409441	-0.479486	-0.76493	-0.544736	-0.888859	-1.15671	-0.23582	-1.20936	-0.311067	0.922244	-0.534867	-1.08868	-0.785854	-1.1618	-1.03865	-0.851677	-0.661696	-0.288235	-0.563039
Macrophage_TIMER***	-0.828379	-0.828379	-0.828379	-0.828379	-0.828379	-0.828379	-0.828379	-0.828379	-0.828379	-0.828379	-0.828379	-0.738574	-0.828379	-0.828379	-0.828379	-0.828379	-0.56402	-0.828379	-0.828379	-0.828379	-0.828379	-0.828379	0.549673	-0.51114	-0.828379	-0.828379	0.0379751	-0.828379	-0.828379	-0.240899	-0.687645	-0.828379	-0.828379	-0.748584	-0.828379	-0.828379	0.887276	-0.828379	0.457616	0.967718	-0.828379	-0.828379	-0.828379	-0.828379	-0.403275	-0.828379	-0.828379	0.0295771	-0.828379
Myeloid dendritic cell_TIMER***	-1.58102	-1.06271	-1.93104	-0.83475	-1.06667	-0.76502	-1.82809	-1.65355	-1.83426	-1.34994	-1.73796	-0.604492	-1.61808	-1.75007	-1.28582	-1.52094	-0.72351	-0.742632	-1.48256	-1.47924	-1.45736	-1.39867	0.114429	-0.657874	-1.15005	-1.28282	0.496759	-1.25209	-1.87929	-0.475113	-0.622397	-0.509254	-1.16195	-0.212245	-1.18694	-0.982939	-0.112309	-1.31823	0.0315169	0.00168875	-0.093843	-1.32834	-1.23557	-1.55491	-0.959027	-0.572198	-1.27158	-0.608471	-0.155894
B cell naive_CIBERSORT***	-0.780805	0.407268	-0.359374	-0.334861	-0.77697	-0.144203	-0.767796	-0.780805	2	2	0.09726	-0.722654	1.98001	-0.653738	-0.514341	-0.780805	0.380057	-0.307189	1.49604	1.49317	0.354116	-0.675965	-0.780805	-0.13184	-0.780805	0.271472	-0.780805	2	2	-0.303155	-0.660733	0.294856	-0.780805	-0.780805	-0.162247	-0.32028	-0.726915	-0.780805	0.175741	-0.562008	1.86141	-0.780805	1.18769	-0.752614	-0.599204	-0.0973559	0.641528	0.417231	-0.768217
B cell memory_CIBERSORT***	-0.184837	-0.438596	-0.438596	-0.438596	-0.438596	-0.438596	-0.276149	-0.438596	-0.438596	-0.438596	-0.438596	-0.192718	-0.438596	-0.438596	-0.438596	-0.438596	-0.438596	-0.438596	-0.438596	-0.438596	-0.438596	-0.147327	-0.0148961	-0.438596	-0.438596	-0.438596	0.256646	-0.438596	-0.438596	-0.438596	-0.438596	-0.438596	1.49679	0.622538	-0.438596	-0.438596	-0.438596	0.78252	-0.438596	-0.438596	-0.438596	-0.438596	-0.438596	0.863539	-0.438596	-0.438596	-0.438596	-0.438596	-0.162057
B cell plasma_CIBERSORT***	-0.821995	0.208841	0.237839	0.0850074	-0.539628	-0.656082	-0.637865	0.384158	0.637135	-0.396369	-0.385863	-0.58566	2	-0.177907	-0.528417	1.48244	-0.259448	-0.849353	-0.569689	1.80281	2	-0.684022	-0.82051	-0.129296	1.0029	2	-0.581765	-0.89196	0.679525	1.11349	0.127906	0.884667	2	-0.142586	-0.00348819	2	0.201737	-0.658546	0.730791	-0.805925	0.509179	-0.22258	0.866098	-0.89196	-0.329087	0.840408	0.978438	0.0257802	-0.486315
T cell CD8+_CIBERSORT***	-0.439385	-0.621782	2	-0.773632	0.667442	-0.320169	1.08156	-0.379162	-0.714325	2	-0.559081	0.358603	-0.773632	0.0958597	-0.105866	0.904083	-0.773632	0.798696	-0.556044	-0.0454244	-0.584878	0.740252	-0.420665	-0.773632	-0.62774	1.42252	-0.773632	-0.773632	0.636902	-0.455191	-0.773632	-0.773632	-0.281506	-0.773632	1.9026	-0.544449	-0.733525	-0.200784	-0.773632	-0.773632	-0.773632	-0.223215	-0.384382	0.0487242	1.83022	-0.101389	-0.773632	-0.773632	-0.773632
T cell CD4+ naive_CIBERSORT***	1.42051	-0.447249	-0.447249	0.117814	-0.447249	-0.447249	-0.447249	-0.447249	-0.447249	-0.447249	2	-0.447249	1.37292	0.391202	-0.234134	-0.447249	1.37215	-0.447249	-0.447249	-0.447249	0.132698	-0.447249	-0.447249	-0.229231	-0.180658	2	0.517024	-0.447249	-0.447249	-0.447249	-0.447249	-0.145272	2	2	-0.447249	1.46233	1.23954	-0.447249	2	0.295352	-0.0317879	-0.447249	0.96303	-0.447249	0.250516	-0.447249	2	1.01746	-0.447249
T cell CD4+ memory resting_CIBERSORT***	-0.0307883	-0.691112	-1.08741	-0.693197	0.20012	0.633387	2	-0.874515	-0.938707	-1.08741	-1.08741	0.720862	-0.994746	-1.08741	-0.513958	0.345122	0.936371	1.71138	0.0821257	-0.599722	-1.08741	1.10353	-0.242812	-0.690882	-0.499007	-1.08741	0.155889	0.641355	-1.08741	-0.631983	0.573808	-0.705601	-1.08741	1.95286	-1.02695	-1.08741	-0.783857	0.186397	-1.03059	0.539449	-0.730683	-0.323385	-1.08741	1.11781	-1.08741	-0.711692	-1.08741	-0.711456	0.741025
T cell CD4+ memory activated_CIBERSORT	-0.0819249	-0.0819249	2	-0.0819249	-0.0819249	-0.0819249	-0.0819249	-0.0819249	-0.0819249	-0.0819249	-0.0819249	-0.0819249	-0.0819249	-0.0819249	-0.0819249	-0.0819249	-0.0819249	-0.0819249	-0.0819249	-0.0819249	-0.0819249	-0.0819249	-0.0819249	-0.0819249	-0.0819249	-0.0819249	-0.0819249	-0.0819249	-0.0819249	-0.0819249	-0.0819249	-0.0819249	-0.0819249	-0.0819249	-0.0819249	-0.0819249	-0.0819249	-0.0819249	-0.0819249	-0.0819249	-0.0819249	-0.0819249	-0.0819249	-0.0819249	-0.0819249	-0.0819249	-0.0819249	-0.0819249	-0.0819249
T cell follicular helper_CIBERSORT*	-0.972652	2	1.13731	0.157304	-0.242102	-0.210581	2	2	1.16865	0.741657	0.865485	-0.972652	0.0175026	2	0.101945	0.338584	-0.972652	-0.0382717	0.243681	-0.181676	2	1.46702	-0.906126	-0.0497738	0.323837	-0.142061	-0.588651	-0.400192	2	-0.274597	-0.3907	0.372967	0.376877	-0.51466	0.152266	-0.548232	-0.972652	2	0.163136	-0.972652	-0.789091	0.653458	-0.0923353	2	0.267353	0.242981	-0.0767382	-0.70917	-0.608327
T cell regulatory (Tregs)_CIBERSORT***	-0.414782	-0.476394	-0.476394	-0.476394	-0.476394	2	2	-0.476394	-0.476394	-0.476394	-0.476394	0.406801	-0.476394	-0.476394	-0.476394	2	0.68393	0.315002	-0.476394	-0.476394	-0.476394	2	-0.476394	-0.476394	-0.255112	-0.476394	-0.476394	-0.296585	-0.476394	-0.476394	-0.476394	-0.476394	-0.476394	0.82919	-0.476394	-0.476394	-0.476394	0.644496	-0.476394	0.154023	-0.476394	-0.476394	-0.476394	2	-0.476394	-0.476394	-0.476394	-0.476394	-0.00140504
T cell gamma delta_CIBERSORT	-0.103146	-0.103146	-0.103146	-0.103146	-0.103146	-0.103146	-0.103146	-0.103146	-0.103146	-0.103146	-0.103146	-0.103146	-0.103146	-0.103146	-0.103146	-0.103146	-0.103146	-0.103146	-0.103146	-0.103146	-0.103146	-0.103146	-0.103146	-0.103146	-0.103146	-0.103146	-0.103146	-0.103146	-0.103146	-0.103146	-0.103146	-0.103146	-0.103146	-0.103146	-0.103146	-0.103146	-0.103146	-0.103146	-0.103146	-0.103146	-0.103146	-0.103146	-0.103146	-0.103146	-0.103146	-0.103146	-0.103146	-0.103146	-0.103146
NK cell resting_CIBERSORT***	1.6688	-0.624421	-0.380533	-0.624421	2	-0.0898149	-0.624421	-0.624421	-0.478865	-0.624421	-0.624421	2	-0.624421	-0.570025	0.483712	2	1.60443	1.7153	-0.451155	-0.624421	-0.624421	0.162237	-0.624421	-0.624421	-0.119713	-0.624421	-0.624421	1.5063	1.23543	-0.624421	-0.624421	-0.624421	-0.624421	1.55671	-0.624421	-0.624421	-0.624421	-0.0258944	-0.624421	0.411175	-0.624421	-0.624421	-0.624421	-0.624421	-0.624421	-0.624421	-0.624421	-0.624421	0.298467
NK cell activated_CIBERSORT***	-1.26643	1.85179	1.69865	-0.188679	-1.26643	0.269967	-0.467436	1.85038	-0.250079	0.745204	-0.824386	-1.26643	-0.175072	1.33067	-0.408282	-1.26643	-1.26643	-0.446979	1.92438	0.311032	0.31955	1.2778	-0.0906243	0.325525	-0.440404	0.0513666	1.70179	-0.682566	-1.26643	0.230869	1.29627	0.452654	0.0807943	-1.26643	0.0704639	-0.563481	-0.765423	-0.346484	-0.0946793	-1.26643	-0.508603	0.694953	0.644828	-1.04663	-0.0824234	0.20326	-0.509306	-0.217015	-1.26643
Monocyte_CIBERSORT***	-0.306061	0.54732	-1.49019	0.509626	-1.04129	-1.13544	-0.727026	-1.32298	-1.24663	-0.802976	1.06657	-1.02048	-1.31382	-1.36235	0.138923	-0.954945	0.0539574	-0.693698	-0.150043	-0.461745	-0.587148	-0.880521	1.58032	2	-1.38821	0.0397254	1.36318	-0.93417	-1.32559	1.37316	-1.23685	1.12011	0.0121081	-1.27525	0.36773	-1.31097	-0.456814	-0.73137	1.85868	-0.340931	2	1.82482	1.96769	-1.00906	-1.48868	0.406979	0.928473	2	-0.708985
Macrophage M0_CIBERSORT**	-0.283843	-0.283843	-0.283843	-0.283843	-0.283843	-0.283843	-0.183139	-0.283843	-0.262055	-0.283843	-0.283843	-0.283843	-0.283843	-0.283843	-0.283843	0.153019	-0.283843	-0.283843	-0.283843	-0.283843	-0.283843	-0.283843	-0.283843	-0.283843	-0.283843	-0.283843	-0.283843	-0.283843	0.801583	-0.283843	-0.283843	-0.283843	-0.283843	-0.283843	-0.283843	2	-0.283843	-0.283843	-0.283843	-0.283843	-0.283843	-0.283843	-0.283843	0.369413	-0.195877	-0.283843	-0.283843	-0.283843	-0.283843
Macrophage M1_CIBERSORT***	-0.68572	0.344242	-0.68572	-0.68572	-0.671336	-0.61741	-0.68572	-0.68572	-0.666722	-0.534558	-0.68572	0.356829	-0.502955	-0.68572	-0.683281	1.22233	-0.132095	-0.540601	0.541615	0.199936	-0.68572	2	-0.266711	-0.517266	-0.436341	-0.68572	-0.68572	-0.68572	-0.68572	0.253848	-0.606276	-0.191849	-0.68572	0.360008	-0.68572	0.0748559	-0.374162	-0.042369	-0.68572	-0.375639	-0.68572	1.15203	-0.68572	-0.0970567	-0.505995	-0.319547	-0.68572	-0.68572	-0.167611
Macrophage M2_CIBERSORT***	0.707859	-0.732135	-1.01804	0.292525	1.52645	0.690879	-1.6279	-0.855132	0.0954639	0.944944	0.314088	0.384617	-0.494468	0.132266	0.967862	-2	-0.528107	0.242633	-0.239212	-0.93424	-1.5794	0.0250151	1.03749	-0.642024	0.540329	-1.1706	-0.154496	1.25243	-0.539423	-0.821712	-0.657976	-1.03578	-1.41638	0.255844	-0.804323	-0.607736	1.7425	-0.0676533	-0.572062	1.2627	-0.763725	-0.561835	-1.66142	-1.1493	2	-0.21495	-0.500019	-0.604034	0.934211
Myeloid dendritic cell resting_CIBERSORT	2	-0.204489	-0.204489	-0.204489	-0.204489	-0.204489	-0.204489	-0.204489	-0.204489	-0.204489	-0.204489	-0.204489	-0.204489	-0.204489	-0.204489	0.510449	1.91698	-0.204489	-0.204489	-0.204489	-0.204489	0.134707	-0.204489	-0.204489	0.0376624	-0.204489	-0.204489	-0.204489	-0.204489	-0.204489	0.553863	-0.204489	-0.204489	-0.204489	-0.204489	-0.204489	-0.204489	2	-0.204489	-0.204489	-0.204489	-0.204489	-0.204489	-0.204489	-0.204489	-0.204489	-0.204489	-0.204489	-0.204489
Myeloid dendritic cell activated_CIBERSORT**	-0.297002	-0.297002	-0.297002	-0.297002	-0.297002	-0.297002	-0.297002	-0.297002	-0.297002	-0.297002	-0.15984	-0.297002	-0.297002	-0.297002	-0.297002	-0.297002	-0.297002	-0.297002	-0.297002	-0.297002	0.0971691	-0.297002	-0.297002	0.736505	-0.297002	-0.297002	-0.297002	0.846123	-0.297002	-0.297002	-0.297002	-0.297002	0.292667	-0.297002	2	-0.297002	-0.297002	-0.297002	-0.297002	-0.297002	1.17251	-0.297002	-0.297002	-0.297002	-0.297002	-0.297002	-0.297002	0.741198	-0.297002
Mast cell activated_CIBERSORT**	2	-0.482884	-0.482884	-0.482884	-0.00649162	2	2	-0.482884	0.654666	-0.482884	-0.482884	2	-0.482884	-0.482884	-0.482884	1.8311	1.97661	0.761257	-0.482884	-0.482884	-0.482884	-0.482884	-0.482884	-0.482884	2	-0.473869	-0.482884	-0.482884	0.206934	-0.482884	-0.482884	-0.482884	-0.482884	0.670522	-0.482884	-0.482884	-0.482884	2	-0.482884	1.33972	-0.482884	-0.482884	-0.482884	2	-0.482884	-0.482884	-0.482884	-0.482884	2
Mast cell resting_CIBERSORT***	-0.732556	0.381661	-0.416583	0.847872	-0.732556	-0.732556	-0.732556	2	-0.732556	-0.485503	0.53101	-0.732556	0.34701	1.97523	0.343374	-0.732556	-0.732556	-0.732556	1.09929	0.398232	-0.732556	-0.541031	-0.413935	0.186057	-0.732556	-0.732556	0.650029	-0.732556	-0.732556	0.0627875	2	0.778593	0.421873	-0.732556	2	-0.682701	-0.335689	-0.732556	-0.411563	-0.732556	-0.051177	0.229772	0.82913	-0.732556	-0.610995	0.263456	0.252012	0.192036	-0.732556
Eosinophil_CIBERSORT	0.0459081	-0.350954	-0.350954	0.123832	-0.350954	-0.350954	-0.350954	1.83646	-0.350954	-0.350954	-0.350954	0.473841	-0.350954	1.46114	-0.350954	-0.216593	-0.350954	-0.350954	0.342856	-0.350954	-0.350954	-0.350954	-0.350954	2	0.596634	-0.350954	0.932327	-0.350954	-0.350954	-0.350954	2	0.175727	-0.350954	-0.350954	1.10292	-0.350954	-0.350954	-0.350954	0.464886	-0.350954	-0.350954	-0.350954	-0.350954	-0.350954	-0.350954	-0.350954	-0.350954	-0.350954	-0.350954
Neutrophil_CIBERSORT***	-0.510031	0.877802	-0.510031	-0.510031	-0.510031	-0.434428	-0.510031	-0.333571	-0.489629	-0.346298	-0.510031	-0.0751267	-0.365413	0.033087	-0.510031	0.0335623	2	1.00328	-0.264347	-0.510031	-0.510031	-0.510031	-0.510031	-0.510031	-0.470784	-0.510031	-0.498428	-0.199659	-0.395287	-0.510031	-0.337888	-0.510031	-0.510031	0.141137	-0.200274	-0.510031	-0.396641	0.0287507	-0.510031	1.44831	-0.510031	-0.510031	-0.138695	-0.132085	-0.510031	-0.510031	-0.510031	-0.510031	0.786289
B cell naive_CIBERSORT-ABS	-0.775118	-0.257126	-0.628271	-0.539989	-0.772816	-0.394022	-0.769643	-0.775118	2	1.87759	-0.453407	-0.745608	0.241564	-0.704685	-0.612348	-0.775118	-0.0348298	-0.496847	0.171414	0.246496	-0.297342	-0.698262	-0.775118	-0.366789	-0.775118	-0.124788	-0.775118	0.992014	0.348511	-0.33403	-0.694424	-0.00450074	-0.775118	-0.775118	-0.433309	-0.517534	-0.723758	-0.775118	-0.220773	-0.54614	0.673431	-0.775118	0.65825	-0.757141	-0.622569	-0.21846	0.145436	0.156092	-0.767238
B cell memory_CIBERSORT-ABS***	-0.302716	-0.375284	-0.375284	-0.375284	-0.375284	-0.375284	-0.328141	-0.375284	-0.375284	-0.375284	-0.375284	-0.289239	-0.375284	-0.375284	-0.375284	-0.375284	-0.375284	-0.375284	-0.375284	-0.375284	-0.375284	-0.228039	-0.145142	-0.375284	-0.375284	-0.375284	-0.0342013	-0.375284	-0.375284	-0.375284	-0.375284	-0.375284	0.488382	0.138146	-0.375284	-0.375284	-0.375284	-0.0314291	-0.375284	-0.375284	-0.375284	-0.375284	-0.375284	0.197345	-0.375284	-0.375284	-0.375284	-0.375284	-0.255909
B cell plasma_CIBERSORT-ABS***	-0.939727	-0.375107	-0.483121	-0.331062	-0.711271	-0.799248	-0.842165	-0.106514	-0.135658	-0.460017	-0.743878	-0.781427	0.441919	-0.480464	-0.697995	0.383464	-0.471002	-0.944711	-0.808302	0.539846	1.31053	-0.785187	-0.905588	-0.3752	0.364197	1.669	-0.699736	-0.976056	-0.379417	1.34281	-0.117844	0.617652	1.80031	-0.317695	-0.36131	1.42194	0.329078	-0.856713	0.201482	-0.863317	-0.0142344	-0.501042	0.626841	-0.976056	-0.384017	0.79068	0.539706	-0.0828607	-0.658109
T cell CD8+_CIBERSORT-ABS***	-0.556546	-0.602157	2	-0.643862	-0.0990144	-0.472859	-0.152058	-0.508636	-0.627464	0.842363	-0.594344	-0.281916	-0.643862	-0.340258	-0.386908	-0.160584	-0.643862	-0.0619189	-0.586881	-0.437775	-0.593807	0.0552397	-0.468727	-0.643862	-0.591948	0.211131	-0.643862	-0.643862	-0.374441	-0.45862	-0.643862	-0.643862	-0.443251	-0.643862	0.287725	-0.563112	-0.619784	-0.496509	-0.643862	-0.643862	-0.643862	-0.447358	-0.465317	-0.313509	0.733992	-0.298953	-0.643862	-0.643862	-0.643862
T cell CD4+ naive_CIBERSORT-ABS***	0.589224	-0.449809	-0.449809	-0.0501383	-0.449809	-0.449809	-0.449809	-0.449809	-0.449809	-0.449809	1.02178	-0.449809	0.449353	0.173641	-0.275176	-0.449809	1.10662	-0.449809	-0.449809	-0.449809	-0.122299	-0.449809	-0.449809	-0.265791	-0.247794	1.81457	0.470444	-0.449809	-0.449809	-0.449809	-0.449809	-0.159597	2	2	-0.449809	0.982978	1.70669	-0.449809	1.53151	0.59272	-0.144265	-0.449809	0.927741	-0.449809	0.336474	-0.449809	2	1.07743	-0.449809
T cell CD4+ memory resting_CIBERSORT-ABS***	-0.639591	-0.829957	-0.953896	-0.804801	-0.399586	-0.214974	0.253179	-0.870791	-0.907076	-0.953896	-0.953896	-0.295666	-0.929418	-0.953896	-0.702628	-0.484013	-0.0281627	0.225645	-0.605143	-0.796734	-0.953896	0.198185	-0.476701	-0.774931	-0.715478	-0.953896	-0.319433	-0.361805	-0.953896	-0.652221	-0.153082	-0.757689	-0.953896	0.576242	-0.929929	-0.953896	-0.74638	-0.580792	-0.930273	0.267357	-0.813613	-0.6433	-0.953896	0.0548368	-0.953896	-0.734388	-0.953896	-0.744283	-0.132897
T cell CD4+ memory activated_CIBERSORT-ABS	-0.0897339	-0.0897339	1.22155	-0.0897339	-0.0897339	-0.0897339	-0.0897339	-0.0897339	-0.0897339	-0.0897339	-0.0897339	-0.0897339	-0.0897339	-0.0897339	-0.0897339	-0.0897339	-0.0897339	-0.0897339	-0.0897339	-0.0897339	-0.0897339	-0.0897339	-0.0897339	-0.0897339	-0.0897339	-0.0897339	-0.0897339	-0.0897339	-0.0897339	-0.0897339	-0.0897339	-0.0897339	-0.0897339	-0.0897339	-0.0897339	-0.0897339	-0.0897339	-0.0897339	-0.0897339	-0.0897339	-0.0897339	-0.0897339	-0.0897339	-0.0897339	-0.0897339	-0.0897339	-0.0897339	-0.0897339	-0.0897339
T cell follicular helper_CIBERSORT-ABS***	-1.03729	0.341726	-0.274471	-0.419137	-0.582354	-0.563953	2	1.9543	-0.062105	0.441844	-0.338535	-1.03729	-0.658971	1.35998	-0.356225	-0.415174	-1.03729	-0.467687	-0.512649	-0.668591	0.542808	0.818335	-0.982922	-0.434813	-0.277423	-0.504693	-0.753846	-0.753692	0.438426	-0.368465	-0.631503	-0.0370754	-0.131198	-0.703878	-0.392332	-0.790988	-1.03729	0.398878	-0.354355	-1.03729	-0.932878	-0.0811042	-0.372216	2	0.0434512	-0.0100007	-0.435671	-0.824802	-0.800667
T cell regulatory (Tregs)_CIBERSORT-ABS***	-0.421926	-0.439378	-0.439378	-0.439378	-0.439378	1.55307	0.327681	-0.439378	-0.439378	-0.439378	-0.439378	-0.133231	-0.439378	-0.439378	-0.439378	1.42274	0.0660527	-0.121766	-0.439378	-0.439378	-0.439378	2	-0.439378	-0.439378	-0.353996	-0.439378	-0.439378	-0.380734	-0.439378	-0.439378	-0.439378	-0.439378	-0.439378	0.186346	-0.439378	-0.439378	-0.439378	-0.126735	-0.439378	0.0112764	-0.439378	-0.439378	-0.439378	1.17586	-0.439378	-0.439378	-0.439378	-0.439378	-0.23628
T cell gamma delta_CIBERSORT-ABS	-0.0936486	-0.0936486	-0.0936486	-0.0936486	-0.0936486	-0.0936486	-0.0936486	-0.0936486	-0.0936486	-0.0936486	-0.0936486	-0.0936486	-0.0936486	-0.0936486	-0.0936486	-0.0936486	-0.0936486	-0.0936486	-0.0936486	-0.0936486	-0.0936486	-0.0936486	-0.0936486	-0.0936486	-0.0936486	-0.0936486	-0.0936486	-0.0936486	-0.0936486	-0.0936486	-0.0936486	-0.0936486	-0.0936486	-0.0936486	-0.0936486	-0.0936486	-0.0936486	-0.0936486	-0.0936486	-0.0936486	-0.0936486	-0.0936486	-0.0936486	-0.0936486	-0.0936486	-0.0936486	-0.0936486	-0.0936486	-0.0936486
NK cell resting_CIBERSORT-ABS***	0.121331	-0.544466	-0.484969	-0.544466	0.735337	-0.320404	-0.544466	-0.544466	-0.499736	-0.544466	-0.544466	0.675369	-0.544466	-0.523356	-0.0705581	0.950108	0.450635	0.41797	-0.494037	-0.544466	-0.544466	-0.140723	-0.544466	-0.544466	-0.344862	-0.544466	-0.544466	0.167801	-0.149647	-0.544466	-0.544466	-0.544466	-0.544466	0.526964	-0.544466	-0.544466	-0.544466	-0.373357	-0.544466	0.214305	-0.544466	-0.544466	-0.544466	-0.544466	-0.544466	-0.544466	-0.544466	-0.544466	-0.140005
NK cell activated_CIBERSORT-ABS**	-1.00529	-0.00327552	-0.243802	-0.586463	-1.00529	-0.327401	-0.757466	0.244818	-0.676487	0.227663	-0.885917	-1.00529	-0.709075	0.0557259	-0.618934	-1.00529	-1.00529	-0.650432	-0.0276228	-0.482956	-0.513199	0.369369	-0.32269	-0.267033	-0.66138	-0.405028	0.551074	-0.799816	-1.00529	0.0137961	0.264076	-0.0975781	-0.362735	-1.00529	-0.460801	-0.715502	-0.65337	-0.728419	-0.504796	-1.00529	-0.699076	-0.186005	0.0204327	-0.901978	-0.272241	-0.123032	-0.644125	-0.404098	-1.00529
Monocyte_CIBERSORT-ABS***	-0.907157	-0.607735	-1.27914	-0.478646	-1.0648	-1.10774	-1.03447	-1.20149	-1.19454	-0.826928	-0.574673	-1.09255	-1.22942	-1.21613	-0.519201	-1.09013	-0.525761	-0.916274	-0.857478	-0.927304	-0.990151	-0.925159	0.558335	0.622188	-1.22558	-0.556133	0.262839	-1.0736	-1.24381	0.734266	-1.13588	0.142974	-0.53474	-1.14908	-0.498293	-1.19383	-0.510672	-1.04356	0.189576	-0.342563	0.196077	0.142394	0.630115	-1.03494	-1.25482	-0.0963569	-0.0891508	1.06632	-0.898641
Macrophage M0_CIBERSORT-ABS***	-0.255059	-0.255059	-0.255059	-0.255059	-0.255059	-0.255059	-0.229226	-0.255059	-0.24923	-0.255059	-0.255059	-0.255059	-0.255059	-0.255059	-0.255059	-0.133284	-0.255059	-0.255059	-0.255059	-0.255059	-0.255059	-0.255059	-0.255059	-0.255059	-0.255059	-0.255059	-0.255059	-0.255059	-0.0544349	-0.255059	-0.255059	-0.255059	-0.255059	-0.255059	-0.255059	0.62015	-0.255059	-0.255059	-0.255059	-0.255059	-0.255059	-0.255059	-0.255059	-0.0011164	-0.210015	-0.255059	-0.255059	-0.255059	-0.255059
Macrophage M1_CIBERSORT-ABS***	-0.513007	-0.278509	-0.513007	-0.513007	-0.508499	-0.491653	-0.513007	-0.513007	-0.508652	-0.447363	-0.513007	-0.236729	-0.477861	-0.513007	-0.512229	-0.0573767	-0.328643	-0.468482	-0.246564	-0.305227	-0.513007	0.632367	-0.34066	-0.457658	-0.439444	-0.513007	-0.513007	-0.513007	-0.513007	-0.0599194	-0.485127	-0.328244	-0.513007	-0.129853	-0.513007	-0.290857	-0.357952	-0.375821	-0.513007	-0.343547	-0.513007	0.0308824	-0.513007	-0.316975	-0.434169	-0.357265	-0.513007	-0.513007	-0.343643
Macrophage M2_CIBERSORT-ABS***	-0.702142	-0.92344	-1.02207	-0.648343	-0.277087	-0.476981	-1.08252	-0.876566	-0.778049	-0.104913	-0.81928	-0.651307	-0.934781	-0.654156	-0.395061	-1.17257	-0.735432	-0.594694	-0.856282	-0.950293	-1.07441	-0.503077	-0.134975	-0.770174	-0.55238	-0.907095	-0.574633	-0.521286	-0.990322	-0.625869	-0.743852	-0.819345	-0.955207	-0.469837	-0.8602	-0.812424	0.357803	-0.835064	-0.789585	0.314262	-0.854242	-0.796768	-0.992629	-0.891805	0.335072	-0.500754	-0.721049	-0.652934	-0.382975
Myeloid dendritic cell resting_CIBERSORT-ABS	1.5644	-0.213442	-0.213442	-0.213442	-0.213442	-0.213442	-0.213442	-0.213442	-0.213442	-0.213442	-0.213442	-0.213442	-0.213442	-0.213442	-0.213442	0.141014	1.25335	-0.213442	-0.213442	-0.213442	-0.213442	0.0561543	-0.213442	-0.213442	-0.065136	-0.213442	-0.213442	-0.213442	-0.213442	-0.213442	0.339125	-0.213442	-0.213442	-0.213442	-0.213442	-0.213442	-0.213442	1.38977	-0.213442	-0.213442	-0.213442	-0.213442	-0.213442	-0.213442	-0.213442	-0.213442	-0.213442	-0.213442	-0.213442
Myeloid dendritic cell activated_CIBERSORT-ABS	-0.280919	-0.280919	-0.280919	-0.280919	-0.280919	-0.280919	-0.280919	-0.280919	-0.280919	-0.280919	-0.242077	-0.280919	-0.280919	-0.280919	-0.280919	-0.280919	-0.280919	-0.280919	-0.280919	-0.280919	-0.152664	-0.280919	-0.280919	0.221693	-0.280919	-0.280919	-0.280919	0.140947	-0.280919	-0.280919	-0.280919	-0.280919	0.0140127	-0.280919	0.766617	-0.280919	-0.280919	-0.280919	-0.280919	-0.280919	0.341766	-0.280919	-0.280919	-0.280919	-0.280919	-0.280919	-0.280919	0.342801	-0.280919
Mast cell activated_CIBERSORT-ABS***	1.21728	-0.496087	-0.496087	-0.496087	-0.199692	1.41635	0.59031	-0.496087	0.0215018	-0.496087	-0.496087	1.2006	-0.496087	-0.496087	-0.496087	0.600784	1.12976	0.261659	-0.496087	-0.496087	-0.496087	-0.496087	-0.496087	-0.496087	1.22588	-0.490311	-0.496087	-0.496087	-0.279267	-0.496087	-0.496087	-0.496087	-0.496087	0.342815	-0.496087	-0.496087	-0.496087	1.43681	-0.496087	1.48115	-0.496087	-0.496087	-0.496087	2	-0.496087	-0.496087	-0.496087	-0.496087	1.35374
Mast cell resting_CIBERSORT-ABS	-0.618467	-0.25704	-0.536553	0.00150573	-0.618467	-0.618467	-0.618467	0.715871	-0.618467	-0.465615	-0.274031	-0.618467	-0.322688	0.498219	-0.129487	-0.618467	-0.618467	-0.618467	-0.0518852	-0.240501	-0.618467	-0.514007	-0.431748	-0.188443	-0.618467	-0.618467	0.113331	-0.618467	-0.618467	-0.072029	1.39452	0.186989	-0.0626639	-0.618467	0.583802	-0.597721	-0.337066	-0.618467	-0.480066	-0.618467	-0.340544	-0.212698	0.227568	-0.618467	-0.542495	-0.0149104	-0.144373	-0.0837805	-0.618467
Eosinophil_CIBERSORT-ABS	-0.166444	-0.282268	-0.282268	-0.106089	-0.282268	-0.282268	-0.282268	0.555472	-0.282268	-0.282268	-0.282268	0.0123004	-0.282268	0.424625	-0.282268	-0.239028	-0.282268	-0.282268	-0.0792794	-0.282268	-0.282268	-0.282268	-0.282268	1.54634	0.0944433	-0.282268	0.36024	-0.282268	-0.282268	-0.282268	0.954099	-0.0167222	-0.282268	-0.282268	0.283136	-0.282268	-0.282268	-0.282268	0.0504736	-0.282268	-0.282268	-0.282268	-0.282268	-0.282268	-0.282268	-0.282268	-0.282268	-0.282268	-0.282268
Neutrophil_CIBERSORT-ABS***	-0.450344	-0.0725978	-0.450344	-0.450344	-0.450344	-0.422089	-0.450344	-0.390395	-0.444753	-0.365342	-0.450344	-0.312563	-0.417097	-0.262402	-0.450344	-0.295162	0.651931	0.104731	-0.386582	-0.450344	-0.450344	-0.450344	-0.450344	-0.450344	-0.436503	-0.450344	-0.445191	-0.357828	-0.428624	-0.450344	-0.378121	-0.450344	-0.450344	-0.165116	-0.343486	-0.450344	-0.382881	-0.312997	-0.450344	0.82911	-0.450344	-0.450344	-0.281544	-0.299879	-0.450344	-0.450344	-0.450344	-0.450344	0.0562452
B cell_QUANTISEQ***	-0.555126	-0.643435	-1.03837	-0.730977	-0.807883	-0.7042	0.0582303	-0.451406	1.20675	-0.0112473	-0.378712	0.18874	0.696445	0.221599	-0.672536	0.173342	-0.319064	-0.0924703	-0.932944	-0.182235	1.07878	0.105535	-0.15106	-1.13629	-0.397193	-0.25173	-0.424844	0.341808	1.41823	0.38661	-0.209397	-1.06463	0.999534	-0.165319	0.965856	-1.07754	-0.408454	-0.848438	-0.0245762	0.659695	-0.17294	-0.353439	0.297979	1.40842	-0.555611	-0.729892	0.165847	-0.680626	-0.128258
Macrophage M1_QUANTISEQ***	-0.438143	-0.438143	-0.438143	-0.438143	-0.438143	-0.438143	-0.438143	-0.438143	-0.438143	-0.438143	-0.438143	-0.438143	-0.438143	-0.438143	-0.438143	-0.438143	-0.438143	-0.438143	-0.438143	-0.438143	-0.438143	-0.438143	-0.361782	-0.438143	-0.438143	-0.438143	-0.438143	-0.438143	-0.438143	-0.438143	-0.438143	-0.438143	-0.438143	-0.438143	-0.438143	-0.438143	-0.438143	-0.438143	-0.282744	-0.438143	-0.438143	-0.438143	-0.438143	-0.438143	-0.438143	-0.438143	-0.438143	-0.438143	-0.438143
Macrophage M2_QUANTISEQ***	-0.86361	-0.86361	-0.86361	-0.86361	-0.86361	-0.716157	-0.86361	-0.86361	-0.86361	-0.86361	-0.86361	-0.353271	-0.86361	-0.86361	-0.715822	-0.86361	-0.138304	-0.672587	-0.86361	-0.86361	-0.86361	-0.86361	-0.260202	0.0567143	-0.86361	-0.86361	-0.109422	-0.325542	-0.86361	-0.373348	-0.86361	-0.86361	-0.86361	-0.86361	-0.86361	-0.733567	0.357935	-0.696965	-0.521737	0.194887	-0.86361	-0.755627	-0.86361	-0.86361	-0.761648	-0.631237	-0.86361	-0.86361	-0.326126
Monocyte_QUANTISEQ***	-0.0528822	0.704279	0.655083	0.813789	1.29283	1.02164	0.819668	-0.466811	-0.221851	-0.255138	0.813101	0.881661	-0.891596	-0.0730864	0.256159	-0.14742	-0.269682	0.386151	1.31349	0.334597	-0.456651	0.227817	1.34342	-1.38791	0.370299	-0.605584	1.15829	-1.38791	0.33982	0.223014	1.45442	0.992077	-0.379907	1.90436	0.342362	-1.08019	0.225613	0.0942116	0.84185	1.91025	0.995489	-0.277374	0.189114	-0.475553	0.965591	-0.676042	0.201039	1.99057	1.22464
Neutrophil_QUANTISEQ	-0.040893	-0.040893	-0.040893	-0.040893	-0.040893	-0.040893	-0.040893	-0.040893	-0.040893	-0.040893	-0.040893	-0.040893	-0.040893	-0.040893	-0.040893	-0.040893	-0.040893	-0.040893	-0.040893	-0.040893	-0.040893	-0.040893	-0.040893	-0.040893	-0.040893	-0.040893	-0.040893	-0.040893	-0.040893	-0.040893	-0.040893	-0.040893	-0.040893	-0.040893	-0.040893	-0.040893	-0.040893	-0.040893	-0.040893	-0.040893	-0.040893	-0.040893	-0.040893	-0.040893	-0.040893	-0.040893	-0.040893	-0.040893	-0.040893
NK cell_QUANTISEQ***	0.587895	-0.174028	-0.349516	-1.01649	-0.321749	-1.03873	-0.825662	0.567186	-1.25705	-1.09755	-0.15628	-0.0672839	-0.252069	-0.449281	0.589695	0.0370265	-0.885748	-1.23049	-0.674007	1.23347	0.639262	-1.02991	0.552524	1.39156	-0.95953	2	-0.392495	-0.829543	-0.222461	1.11683	-0.16144	1.40408	1.11251	1.16892	0.851017	0.325214	0.161668	-0.795678	0.337379	0.677533	0.246669	1.02388	0.764708	-0.458626	-0.105203	0.408206	0.959329	1.21583	-1.09131
T cell CD4+ (non-regulatory)_QUANTISEQ*	-0.340248	-0.340248	-0.340248	0.0657545	-0.340248	-0.340248	1.23227	2	-0.340248	1.54035	-0.340248	-0.340248	2	1.76669	-0.340248	-0.340248	-0.340248	0.811906	-0.340248	-0.340248	-0.340248	-0.162734	-0.340248	-0.340248	1.48205	-0.340248	-0.340248	1.80405	1.09986	-0.340248	-0.340248	-0.340248	-0.340248	-0.340248	-0.340248	-0.340248	-0.340248	-0.340248	-0.340248	-0.340248	-0.340248	-0.340248	-0.340248	-0.340248	-0.340248	-0.340248	-0.340248	-0.340248	-0.340248
T cell CD8+_QUANTISEQ	-0.137074	-0.137074	-0.137074	-0.137074	-0.137074	-0.137074	0.671951	-0.137074	-0.137074	0.0713564	-0.137074	-0.137074	-0.137074	-0.137074	-0.137074	-0.137074	-0.137074	0.555688	-0.137074	-0.137074	-0.137074	-0.137074	-0.137074	-0.137074	-0.137074	-0.137074	-0.137074	-0.137074	-0.137074	-0.137074	-0.137074	-0.137074	-0.137074	-0.137074	-0.137074	-0.137074	-0.137074	-0.137074	-0.137074	-0.137074	-0.137074	-0.137074	-0.137074	-0.137074	-0.137074	-0.137074	-0.137074	-0.137074	-0.137074
T cell regulatory (Tregs)_QUANTISEQ	-0.404683	-0.404683	2	-0.160894	-0.404683	-0.404683	1.83166	2	0.842425	0.512202	-0.247574	-0.404683	1.39499	1.40204	1.24021	1.96493	0.709317	0.158785	1.45081	-0.404683	1.38577	-0.351381	-0.404683	-0.404683	0.47688	-0.404683	-0.404683	1.07197	1.3806	-0.404683	-0.330418	-0.404683	-0.304939	1.61131	-0.404683	-0.404683	-0.404683	-0.404683	-0.404683	-0.404683	-0.404683	0.348039	-0.404683	1.95513	-0.404683	-0.404683	0.383207	-0.404683	0.439322
Myeloid dendritic cell_QUANTISEQ***	-0.332146	-0.761119	-0.644458	-1.03023	-1.24556	-0.664643	-1.17014	0.512324	-0.322138	0.496529	-1.17865	-0.807311	0.199189	-0.422108	-0.454892	0.305277	-0.33429	-0.546726	-1.24556	-0.413399	0.0270725	-0.769	-0.961653	1.45328	-0.88988	0.750811	-1.24556	0.897015	-1.06351	-0.0778266	-1.03206	-0.150842	0.929742	-1.24556	-0.523694	0.873339	-0.770438	-1.01806	-1.06889	-0.928316	-1.09978	0.236468	-0.0415201	0.13283	-0.879952	1.1168	-0.296807	-1.1275	-1.13819
uncharacterized cell_QUANTISEQ***	1.21827	1.1295	0.895646	1.49649	1.02617	0.952342	0.811414	-0.44112	1.8556	0.570137	1.36163	0.436556	0.836009	0.794844	0.714047	0.584869	1.431	1.0673	0.974881	0.520954	0.892668	1.89949	-0.274402	-0.000140784	1.25555	0.0559018	0.599663	0.759668	0.928646	-0.07343	0.471387	-0.452935	-0.111521	-0.636206	0.641785	1.27994	0.596649	2	0.641759	-1.41938	0.885768	0.526977	0.462159	1.19165	0.831131	0.416811	0.548674	-0.588285	0.75852
T cell_MCPCOUNTER	-0.839319	-0.467505	-0.60805	-0.773171	-0.622092	-0.54013	-0.804548	-0.778372	-0.630011	-0.719972	-0.710149	-0.383467	-0.86636	-0.856435	-0.635545	-0.869476	-0.608624	-0.611298	-0.454204	0.240376	-0.82287	-0.603661	-0.763556	-0.636895	-0.814508	-0.435061	-0.596352	-0.916864	-0.899158	-0.536402	-0.52008	-0.20712	-0.649709	-0.675245	-0.556568	-0.367504	-0.228571	-0.691625	-0.685604	-0.499015	-0.585879	-0.620803	-0.684374	-0.883581	-0.475637	-0.518659	-0.603145	-0.402952	-0.274086
T cell CD8+_MCPCOUNTER***	-0.379165	-0.262284	-0.344351	-0.45472	-0.166709	-0.173656	-0.523334	-0.421806	-0.137865	0.147761	-0.524495	-0.212143	-0.377372	-0.279541	-0.411168	-0.374821	0.313284	-0.146304	-0.453471	-0.356269	-0.460638	0.24155	-0.24501	-0.0360779	-0.647685	-0.109555	-0.368317	-0.647685	-0.600898	-0.151554	-0.215445	-0.241545	-0.51569	-0.473521	-0.146321	-0.00794389	0.162711	-0.44282	-0.457248	-0.356935	-0.431264	0.0253363	-0.171082	0.0600577	-0.171295	-0.0217053	-0.385081	-0.647685	-0.454836
cytotoxicity score_MCPCOUNTER***	-0.03661	-0.458457	-0.0732564	0.373723	0.0339768	-0.683383	-1.08497	2	0.867387	-0.379872	0.82341	0.305149	0.34946	0.125213	-0.215344	0.617474	0.230071	0.0958356	-0.272174	-0.493319	0.768042	0.100364	0.48784	-0.927693	0.0996465	0.231209	-0.161103	-0.211175	0.304324	0.181959	-0.272805	1.58736	0.765257	0.165036	0.674348	-0.206301	-0.8015	-0.0724778	-0.354747	0.814689	-0.683931	-0.147124	0.685127	0.28672	0.222064	-0.18501	1.32757	1.51952	-0.66909
NK cell_MCPCOUNTER***	1.23406	2	0.439058	0.838035	0.539335	0.33022	-0.570578	-0.754955	-0.964996	-0.746062	0.928125	0.291837	-1.26894	-0.841115	0.0376845	-0.520967	-0.173774	-0.198295	2	-1.10724	-0.742926	1.07383	-0.298552	-1.09049	1.87288	0.675075	0.620743	-1.36241	-0.63417	0.210875	-0.632686	0.661741	-0.519104	1.56111	0.601459	-0.624381	1.30355	-0.280262	0.391018	-0.160273	0.000816644	-0.603937	0.319926	-0.692112	0.774336	-0.296777	0.552318	0.743012	-0.943266
B cell_MCPCOUNTER**	-0.770584	-0.794962	-0.705929	-0.718202	-0.753734	-0.654536	-0.540989	-0.485978	-0.11795	-0.357399	-0.815853	-0.182338	-0.253497	-0.695853	-0.533835	-0.678172	-0.697716	-0.636833	-0.591428	-0.105814	-0.779335	-0.717095	-0.71462	-0.664505	-0.661733	-0.259758	-0.642624	-0.587446	-0.751408	-0.582434	-0.653914	-0.547864	-0.660047	-0.68686	-0.686579	-0.379411	-0.131315	-0.813237	-0.651208	-0.524334	-0.286558	-0.587166	-0.769867	-0.3305	-0.404115	-0.663179	-0.726649	-0.635575	-0.622616
Monocyte_MCPCOUNTER***	0.015497	-0.418861	-1.47124	0.694721	-0.73382	-0.587389	-1.58555	-0.540397	-1.54606	-0.901842	-0.666558	0.0449539	-1.35695	-1.30102	0.557935	-0.463062	0.820147	-0.407496	0.251009	-1.17705	-0.659665	-0.585666	1.07678	1.01392	-1.04362	-0.621172	0.705288	-0.942624	-1.36071	-0.0210671	-0.232045	-0.289772	-0.20403	1.93165	-0.113574	0.911332	0.818433	-0.585137	1.89763	1.25332	0.521366	-0.842361	-0.0212039	-1.38404	0.652236	-0.536232	0.487957	0.598561	-0.0626059
Macrophage/Monocyte_MCPCOUNTER***	0.015497	-0.418861	-1.47124	0.694721	-0.73382	-0.587389	-1.58555	-0.540397	-1.54606	-0.901842	-0.666558	0.0449539	-1.35695	-1.30102	0.557935	-0.463062	0.820147	-0.407496	0.251009	-1.17705	-0.659665	-0.585666	1.07678	1.01392	-1.04362	-0.621172	0.705288	-0.942624	-1.36071	-0.0210671	-0.232045	-0.289772	-0.20403	1.93165	-0.113574	0.911332	0.818433	-0.585137	1.89763	1.25332	0.521366	-0.842361	-0.0212039	-1.38404	0.652236	-0.536232	0.487957	0.598561	-0.0626059
Myeloid dendritic cell_MCPCOUNTER***	-0.524104	-0.209675	-0.287235	-0.0390118	1.12188	0.526938	-0.311757	-0.415669	-0.386092	-0.182102	-0.889015	-0.616931	-0.657159	-0.708915	-0.558375	-0.530194	-0.233211	-0.106753	-0.406518	-0.635518	-0.677063	-0.0182421	-0.315959	-0.709349	-0.620365	-0.641401	-0.558497	-0.0340152	-0.83465	-0.277696	2	-0.561146	-0.591389	-0.194993	-0.811293	-0.592646	-0.0496647	-0.833887	-0.507128	-0.474493	-0.647297	-0.739611	-0.670748	-0.32648	-0.575573	-0.303992	-0.565834	-0.325287	1.3723
Neutrophil_MCPCOUNTER***	-0.146253	-0.190523	-0.26043	-0.0623715	-0.169354	-0.19841	-0.159597	0.174455	-0.0465854	-0.202565	-0.0108807	-0.0749181	-0.118249	-0.0223244	-0.172947	0.15833	-0.0860131	-0.198813	-0.21582	-0.085227	0.0119329	-0.194582	-0.0905408	0.155084	-0.114497	-0.0191106	0.0481441	0.0787968	-0.072229	-0.0166079	-0.0643471	-0.0521543	0.0410459	0.0653722	-0.0554764	-0.0085523	0.229578	-0.24703	0.233	-0.0130292	0.218004	-0.0726255	0.166965	-0.0121614	-0.0237698	-0.0146962	0.159641	-0.0739772	-0.0412846
Endothelial cell_MCPCOUNTER***	-0.677992	-0.819702	-0.17687	-0.57116	-0.610764	-0.825362	0.595552	-0.7203	-0.180483	1.31387	-1.02219	-0.764576	0.666957	-0.0193201	-0.339158	-0.128891	0.833631	0.432511	-1.0848	-0.0679766	-0.357643	0.837596	-0.299849	-0.468447	-0.380535	-0.915076	-0.973061	2	-0.452438	-0.0230577	-0.250219	-0.841573	0.0836391	-1.10148	-0.528447	0.502662	0.0157398	-0.853302	-0.414737	-0.250243	-0.767397	-0.992639	-0.271033	0.0288912	0.994809	1.41678	-0.336915	-0.552703	-0.065767
Cancer associated fibroblast_MCPCOUNTER***	-0.323367	-0.30363	-0.146517	-0.278452	-0.237569	-0.283683	-0.244807	-0.309262	-0.321003	-0.103104	-0.301564	-0.334107	-0.268353	-0.334364	-0.329497	-0.270199	-0.195015	-0.0721916	-0.185536	-0.335923	-0.318746	-0.0993901	-0.318657	-0.259091	-0.140046	-0.34193	-0.347844	-0.17388	-0.306281	-0.321561	-0.357961	-0.352405	-0.334409	-0.225223	-0.354717	-0.321496	-0.294569	-0.309366	-0.194121	-0.315434	-0.319409	-0.328484	-0.187089	-0.214951	-0.284349	-0.177843	-0.290886	-0.319729	-0.358394
Myeloid dendritic cell activated_XCELL	-0.537322	-0.819203	-1.00003	0.357839	0.533431	-0.391063	-0.879068	-0.954896	-1.00003	0.455837	-0.41061	-0.0107266	-0.980067	-0.691058	-0.358956	-0.784822	0.0261469	0.807912	0.900838	-0.981491	-1.00003	1.27345	0.60411	-0.287647	-0.663829	-1.00003	0.412713	0.307238	-1.00003	0.430044	-0.170198	-0.182925	-1.00003	-0.423869	-0.984819	-0.971358	0.251043	0.221935	-0.540715	0.634	-1.00003	-0.308406	-0.600524	-0.996924	0.562106	-0.34751	-0.421652	-0.358306	0.713166
B cell_XCELL*	-0.36655	-0.36655	-0.36655	-0.36655	-0.36655	-0.36655	-0.36655	-0.36655	-0.36655	-0.36655	-0.36655	-0.36655	-0.36655	-0.36655	-0.36655	-0.36655	-0.36655	-0.36655	-0.0060174	-0.36655	-0.36655	-0.36655	-0.36655	-0.36655	-0.36655	-0.36655	0.248193	-0.36655	-0.36655	-0.36655	-0.36655	-0.36655	-0.36655	-0.0831692	-0.36655	-0.36655	-0.36655	-0.36655	-0.36655	1.33482	-0.36655	-0.36655	-0.36655	-0.36655	-0.36655	-0.36655	-0.36655	-0.36655	-0.36655
T cell CD4+ memory_XCELL***	-0.292584	-0.292584	-0.292584	-0.292584	-0.292584	-0.292584	-0.237936	-0.292584	-0.292584	-0.292584	-0.292584	-0.292584	-0.292584	-0.292584	-0.292584	-0.292584	-0.292584	-0.292584	-0.292584	-0.292584	-0.292584	-0.292584	-0.292584	-0.292584	-0.292584	-0.292584	-0.292584	-0.292584	-0.292584	-0.292584	0.513539	-0.292584	-0.292584	-0.292584	-0.292584	-0.292584	-0.292584	-0.292584	-0.292584	-0.292584	-0.292584	-0.292584	-0.292584	-0.292584	-0.292584	-0.292584	-0.292584	-0.292584	-0.292584
T cell CD4+ naive_XCELL	-0.150705	-0.150705	-0.150705	-0.150705	-0.150705	-0.150705	-0.150705	-0.150705	-0.150705	-0.150705	-0.150705	-0.150705	-0.150705	-0.150705	-0.150705	-0.150705	-0.150705	-0.150705	-0.150705	-0.150705	-0.150705	-0.150705	-0.150705	-0.150705	-0.150705	-0.150705	-0.150705	-0.150705	-0.150705	-0.150705	-0.150705	-0.150705	-0.150705	0.396113	-0.150705	-0.150705	-0.150705	-0.150705	-0.150705	-0.150705	-0.150705	-0.150705	-0.150705	-0.150705	-0.150705	-0.150705	-0.150705	-0.150705	-0.150705
T cell CD4+ (non-regulatory)_XCELL	-0.0681287	-0.0681287	-0.0681287	-0.0681287	-0.0681287	-0.0681287	-0.0681287	-0.0681287	-0.0681287	-0.0681287	-0.0681287	-0.0681287	-0.0681287	-0.0681287	-0.0681287	-0.0681287	-0.0681287	-0.0681287	-0.0681287	-0.0681287	-0.0681287	-0.0681287	-0.0681287	-0.0681287	-0.0681287	-0.0681287	-0.0681287	-0.0681287	-0.0681287	-0.0681287	-0.0681287	-0.0681287	-0.0681287	-0.0681287	-0.0681287	-0.0681287	-0.0681287	-0.0681287	-0.0681287	-0.0681287	-0.0681287	-0.0681287	-0.0681287	-0.0681287	-0.0681287	-0.0681287	-0.0681287	-0.0681287	-0.0681287
T cell CD4+ central memory_XCELL	-0.379291	-0.379291	-0.379291	-0.379291	-0.379291	-0.379291	2	-0.374821	1.51043	1.66515	0.219108	-0.379291	0.313483	1.37222	-0.379291	-0.379291	-0.379291	-0.379291	2	0.629921	-0.379291	-0.379291	-0.379291	-0.379291	2	0.294621	-0.379291	-0.379291	-0.379291	-0.379291	-0.379291	-0.379291	-0.379291	2	-0.379291	-0.379291	-0.379291	-0.260767	-0.379291	-0.379291	-0.379291	0.174845	2	2	0.515786	-0.379291	1.63138	-0.379291	-0.379291
T cell CD4+ effector memory_XCELL**	-0.262476	-0.262476	-0.262476	-0.262476	-0.262476	-0.262476	-0.262476	-0.262476	-0.262476	-0.262476	-0.262476	-0.262476	-0.262476	-0.262476	-0.262476	-0.262476	-0.262476	-0.262476	-0.262476	-0.262476	-0.262476	-0.262476	-0.262476	-0.262476	-0.262476	-0.262476	-0.262476	-0.262476	-0.262476	-0.262476	-0.262476	-0.262476	-0.262476	-0.262476	-0.262476	-0.262476	-0.262476	-0.262476	-0.262476	-0.262476	-0.262476	-0.262476	-0.262476	-0.262476	-0.262476	-0.262476	-0.262476	-0.262476	-0.262476
T cell CD8+ naive_XCELL***	-0.412879	-0.412879	0.957453	-0.412879	0.048778	-0.412879	1.53132	1.09796	-0.0150131	2	-0.412879	-0.412879	-0.185049	1.84792	-0.412879	-0.412879	-0.412879	1.82404	-0.412879	0.582899	-0.412879	-0.412879	-0.412879	-0.412879	0.666132	-0.412879	-0.412879	-0.412879	1.07193	-0.412879	1.04438	-0.412879	-0.350056	-0.412879	-0.392334	-0.412879	-0.412879	-0.412879	-0.412879	-0.412879	-0.412879	-0.412879	-0.412879	2	-0.412879	-0.412879	-0.222275	-0.412879	0.0554641
T cell CD8+_XCELL	-0.0850899	-0.0850899	-0.0850899	-0.0850899	-0.0850899	-0.0850899	-0.0850899	-0.0850899	-0.0850899	-0.0850899	-0.0850899	-0.0850899	-0.0850899	-0.0850899	-0.0850899	-0.0850899	-0.0850899	-0.0850899	-0.0850899	-0.0850899	-0.0850899	-0.0850899	-0.0850899	-0.0850899	-0.0850899	-0.0850899	-0.0850899	-0.0850899	-0.0850899	-0.0850899	-0.0850899	-0.0850899	-0.0850899	-0.0850899	-0.0850899	-0.0850899	-0.0850899	-0.0850899	-0.0850899	-0.0850899	-0.0850899	-0.0850899	-0.0850899	-0.0850899	-0.0850899	-0.0850899	-0.0850899	-0.0850899	-0.0850899
T cell CD8+ central memory_XCELL***	-0.151563	-0.151563	-0.151563	-0.151563	-0.151563	-0.151563	-0.151563	-0.151563	-0.151563	-0.151563	-0.151563	-0.151563	-0.151563	-0.151563	-0.151563	-0.151563	-0.151563	-0.151563	-0.151563	-0.151563	-0.151563	-0.151563	-0.151563	-0.151563	-0.151563	-0.151563	-0.151563	-0.151563	-0.151563	-0.151563	-0.151563	-0.151563	-0.151563	-0.151563	-0.151563	-0.151563	-0.151563	-0.151563	-0.151563	-0.151563	-0.151563	-0.151563	-0.151563	-0.151563	-0.151563	-0.151563	-0.151563	-0.151563	-0.151563
T cell CD8+ effector memory_XCELL	-0.058055	-0.058055	-0.058055	-0.058055	-0.058055	-0.058055	-0.058055	-0.058055	-0.058055	-0.058055	-0.058055	-0.058055	-0.058055	-0.058055	-0.058055	-0.058055	-0.058055	-0.058055	-0.058055	-0.058055	-0.058055	-0.058055	-0.058055	-0.058055	-0.058055	-0.058055	-0.058055	-0.058055	-0.058055	-0.058055	-0.058055	-0.058055	-0.058055	-0.058055	-0.058055	-0.058055	-0.058055	-0.058055	-0.058055	-0.058055	-0.058055	-0.058055	-0.058055	-0.058055	-0.058055	-0.058055	-0.058055	-0.058055	-0.058055
Class-switched memory B cell_XCELL	-0.586819	-0.750375	-0.750375	1.10422	-0.750375	0.61761	-0.642111	0.041033	-0.750375	-0.750375	-0.150237	1.00776	-0.750375	-0.750375	-0.750375	-0.750375	-0.750375	-0.750375	1.12201	-0.750375	-0.750375	-0.750375	-0.594494	-0.750375	-0.311272	-0.750375	1.87608	-0.750375	-0.750375	-0.750375	0.518045	-0.647203	-0.750375	0.385301	0.0061666	-0.750375	-0.305691	-0.750375	2	-0.750375	1.13624	-0.750375	0.794856	-0.750375	-0.383166	-0.0165937	0.0708013	0.978612	1.61276
Common lymphoid progenitor_XCELL***	-0.918558	0.33326	-0.170099	-0.75406	-0.234965	-0.719945	-0.520765	-0.918558	0.0809061	-0.715662	-0.918558	-0.771722	-0.450752	-0.712284	-0.341013	-0.918558	-0.324372	1.47509	-0.918558	-0.610688	-0.343241	-0.918558	-0.598853	-0.417457	-0.447445	-0.683993	-0.58093	-0.746651	-0.639496	-0.575423	-0.185173	-0.918558	-0.757477	-0.918558	-0.737534	-0.381685	-0.556236	-0.918558	-0.918558	-0.486847	-0.775382	-0.734923	-0.66597	-0.918558	-0.918558	-0.771179	-0.876852	-0.918558	-0.0205553
Common myeloid progenitor_XCELL	-0.176939	-0.176939	-0.176939	-0.176939	-0.176939	-0.176939	-0.176939	-0.176939	-0.176939	-0.176939	-0.176939	2	-0.176939	-0.176939	-0.176939	-0.176939	-0.176939	-0.176939	2	-0.176939	-0.176939	-0.176939	-0.176939	-0.176939	-0.176939	-0.176939	-0.176939	-0.176939	-0.176939	-0.176939	-0.176939	-0.176939	-0.176939	0.0796159	-0.176939	-0.176939	-0.176939	-0.176939	-0.176939	-0.176939	-0.176939	-0.176939	-0.176939	-0.176939	-0.176939	-0.176939	-0.176939	-0.176939	-0.176939
Myeloid dendritic cell_XCELL**	-0.154731	-0.154731	-0.154731	-0.154731	-0.154731	-0.154731	-0.154731	-0.154731	-0.154731	-0.154731	-0.154731	-0.154731	-0.154731	-0.154731	-0.154731	-0.154731	-0.154731	-0.154731	-0.154731	-0.154731	-0.154731	-0.0370838	-0.154731	-0.154731	-0.154731	-0.154731	-0.154731	-0.154731	-0.154731	-0.154731	1.26096	-0.154731	-0.154731	-0.154731	-0.154731	-0.154731	-0.154731	-0.154731	-0.154731	-0.154731	-0.154731	-0.154731	-0.154731	-0.154731	-0.0758817	-0.154731	-0.154731	-0.154731	-0.154731
Endothelial cell_XCELL***	-0.272822	-0.165385	2	-0.28385	0.0386914	0.442721	2	-0.917148	0.976171	2	-0.779408	-0.0628385	0.835914	0.307659	-0.567034	-0.150181	2	1.63173	0.243425	0.661132	-0.543468	2	-0.64971	-0.277119	-0.481504	-0.782876	-0.504465	2	-0.228229	-0.135417	-0.508779	-0.647555	-0.699711	-1.02	-0.904209	-0.518631	0.0379289	-0.557778	-0.788408	-0.239729	-0.818675	-0.605889	-0.53054	0.686993	0.230092	2	-0.760624	-0.829286	0.080556
Eosinophil_XCELL***	-0.28884	-0.28884	-0.28884	-0.28884	-0.28884	-0.28884	-0.28884	-0.28884	-0.28884	-0.28884	-0.28884	0.403	-0.28884	-0.0294199	-0.28884	-0.28884	-0.28884	-0.28884	-0.28884	-0.28884	-0.28884	-0.28884	-0.28884	-0.28884	-0.28884	-0.28884	-0.28884	-0.28884	-0.28884	0.40787	-0.28884	-0.28884	-0.28884	-0.28884	-0.28884	-0.28884	-0.28884	-0.28884	-0.28884	-0.28884	-0.28884	-0.28884	2	-0.28884	-0.28884	-0.28884	-0.28884	-0.28884	-0.28884
Cancer associated fibroblast_XCELL**	-0.556721	1.07983	1.34762	1.48676	1.44246	1.02316	-0.639513	0.330884	-1.24305	1.69525	-0.425698	-0.0141543	0.166358	-1.19487	-1.01588	0.150996	-0.0492333	0.678195	0.435416	0.053109	-0.72884	0.0434303	0.460093	-0.0722843	0.123674	-1.09304	1.22165	-0.866296	-1.30803	-0.654208	-0.854138	-0.0412727	-0.76703	-0.10834	-0.834945	0.380396	0.0153496	-0.815872	-0.167661	-0.773919	0.307978	-0.377655	0.900783	-0.530825	0.333118	1.26773	0.261394	0.407672	-0.0425014
Granulocyte-monocyte progenitor_XCELL	-0.256677	-0.256677	-0.256677	-0.256677	-0.256677	-0.256677	-0.256677	-0.256677	-0.256677	-0.256677	-0.256677	-0.256677	-0.256677	-0.256677	-0.256677	-0.256677	-0.256677	-0.256677	-0.256677	-0.256677	-0.256677	-0.256677	-0.256677	-0.256677	-0.256677	-0.256677	-0.256677	-0.256677	-0.256677	-0.256677	-0.256677	-0.256677	-0.256677	-0.256677	-0.256677	-0.256677	-0.256677	-0.256677	-0.256677	-0.256677	-0.256677	-0.256677	-0.256677	-0.256677	-0.256677	-0.256677	-0.256677	-0.256677	-0.256677
Hematopoietic stem cell_XCELL***	-0.981363	1.06431	1.24007	-0.87829	0.0790125	-0.390544	-0.161014	-0.571143	-0.249432	-0.0512256	-0.832145	0.00591291	-0.460852	-0.686129	-0.909419	-0.512183	0.0333364	-0.122691	-0.895791	0.332936	0.122988	0.553466	-0.0338464	-0.476473	-1.37264	0.376836	-0.932408	-0.581268	-0.0801333	-0.280569	-0.0536373	-0.727591	-0.215367	-1.2798	-0.454188	-1.09517	-0.428383	-0.946213	-0.904653	-0.120365	-0.945885	-0.449684	-0.912806	-0.167651	-0.727144	1.12871	-0.574439	-0.830516	-0.54924
Macrophage_XCELL***	-0.933302	-0.535439	-1.16458	-0.699478	-0.431184	-0.145375	-1.16458	-1.16458	-1.12019	-0.695908	-0.926401	-0.121705	-1.14939	-0.841375	-0.551567	-1.16458	-0.365801	-0.360697	-0.304825	-1.0054	-1.00093	-0.787795	0.249179	0.200331	-0.745469	-1.1369	0.35779	-0.502157	-1.16458	0.317766	-0.511223	-0.487609	-1.12918	-0.753058	-1.0237	-0.287453	0.109342	-0.35317	-0.383085	0.442647	-0.453535	-0.750369	-0.838352	-0.988849	0.359171	-0.882121	-0.877746	-0.622155	0.246606
Macrophage M1_XCELL***	-0.824768	-0.797891	-1.03898	-0.639442	-0.587503	-0.104641	-1.03898	-1.03898	-1.01105	-0.388659	-0.743681	-0.312091	-1.03898	-1.02784	-0.654901	-1.03898	-0.416369	0.0982808	-0.0290284	-1.03898	-1.03898	-0.628349	0.0841362	-0.01665	-0.885835	-1.03898	0.0866459	-0.44461	-1.03898	-0.0139209	-0.2276	-0.57847	-1.03898	-0.662211	-1.0244	-0.82535	0.12449	-0.349484	-0.333698	0.270526	-0.762601	-0.634667	-0.850967	-0.995176	-0.182848	-0.736654	-0.919624	-0.707744	0.33823
Macrophage M2_XCELL***	-0.948578	-0.948578	-0.948578	-0.948578	-0.450665	-0.889895	-0.884779	-0.948578	-0.71996	-0.547038	-0.592065	-0.830851	-0.698688	-0.000805807	-0.706824	-0.846747	-0.444157	-0.948578	-0.454477	-0.81253	-0.125683	0.714236	-0.865034	-0.383377	-0.131265	-0.78871	-0.948578	-0.70174	-0.699002	0.0867372	-0.739462	-0.948578	-0.745881	-0.948578	-0.783107	-0.351001	-0.638514	1.23338	-0.899081	-0.844182	-0.887771	-0.679907	-0.948578	-0.613673	0.93781	-0.885784	-0.452345	-0.690338	-0.315524
Mast cell_XCELL*	-0.903824	-0.903824	-0.903824	0.461942	-0.475334	-0.128159	-0.386971	-0.735036	-0.226775	-0.859987	-0.769285	1.66419	-0.643981	-0.377932	-0.319695	-0.48658	0.176776	0.62132	-0.0249653	-0.635645	-0.795115	-0.903824	0.535853	-0.668272	-0.769795	-0.903824	1.6639	-0.360381	-0.317598	-0.165155	-0.0924902	0.29464	-0.619325	1.29068	-0.557832	-0.446652	1.49254	-0.810065	1.2732	1.13753	0.536805	-0.64087	0.0171996	-0.538545	-0.687826	-0.543184	-0.596969	0.290886	-0.0596801
B cell memory_XCELL***	-0.186194	-0.186194	-0.186194	-0.186194	-0.186194	-0.186194	-0.186194	-0.186194	-0.186194	-0.186194	-0.186194	-0.186194	-0.186194	-0.186194	-0.186194	-0.186194	-0.186194	-0.186194	-0.186194	-0.186194	-0.186194	-0.186194	-0.186194	-0.186194	-0.186194	-0.186194	-0.186194	-0.186194	-0.186194	-0.186194	-0.186194	-0.186194	-0.186194	-0.186194	-0.186194	-0.186194	-0.186194	-0.186194	-0.186194	-0.186194	-0.186194	-0.186194	-0.186194	-0.186194	-0.186194	-0.186194	-0.186194	-0.186194	-0.186194
Monocyte_XCELL***	-0.561542	-0.623665	-0.623665	-0.623665	-0.617023	-0.282163	-0.623665	-0.623665	-0.623665	-0.450667	-0.623665	-0.351969	-0.623665	-0.623665	-0.509518	-0.623665	-0.428602	-0.106918	-0.247725	-0.623665	-0.623665	-0.623665	0.142924	-0.623665	-0.50022	-0.623665	0.0464752	-0.623665	-0.623665	-0.48015	-0.113114	-0.623665	-0.623665	-0.554185	-0.623665	-0.623665	0.116286	-0.623665	-0.485555	0.537533	-0.623665	-0.623665	-0.623665	-0.623665	-0.598926	-0.623665	-0.623665	-0.623665	-0.10711
B cell naive_XCELL	-0.0921766	-0.0921766	-0.0921766	-0.0921766	-0.0921766	-0.0921766	-0.0921766	-0.0921766	-0.0921766	-0.0921766	-0.0921766	-0.0921766	-0.0921766	-0.0921766	-0.0921766	-0.0921766	-0.0921766	-0.0921766	-0.0921766	-0.0921766	-0.0921766	-0.0921766	-0.0921766	-0.0921766	-0.0921766	-0.0921766	-0.0921766	-0.0921766	-0.0921766	-0.0921766	-0.0921766	-0.0921766	-0.0921766	-0.0921766	-0.0921766	-0.0921766	-0.0921766	-0.0921766	-0.0921766	-0.0921766	-0.0921766	-0.0921766	-0.0921766	-0.0921766	-0.0921766	-0.0921766	-0.0921766	-0.0921766	-0.0921766
Neutrophil_XCELL***	0.0409281	-0.756158	-0.756158	-0.182083	0.220334	1.49178	-0.756158	0.060959	-0.756158	0.508349	-0.756158	1.47626	-0.756158	-0.117503	0.701093	-0.756158	2	0.8293	-0.739264	-0.756158	-0.756158	-0.189923	0.733016	0.742407	1.24597	-0.756158	0.148371	0.16286	-0.756158	0.738693	1.05075	0.00603369	-0.363256	-0.105715	-0.756158	-0.344449	0.631536	-0.756158	0.680512	1.64124	-0.202124	-0.293186	0.0638012	-0.491199	0.208099	0.436137	-0.756158	0.306621	1.75933
NK cell_XCELL***	-0.444677	-0.201225	0.419082	0.605453	-0.256318	-0.617115	-0.617115	-0.617115	-0.0331105	-0.55772	2	-0.617115	0.652053	2	2	1.62433	-0.617115	-0.270638	-0.617115	-0.617115	-0.617115	-0.617115	-0.617115	-0.617115	1.22342	-0.0252273	1.50061	0.612947	-0.617115	0.888192	-0.440981	-0.447869	-0.617115	2	1.04613	2	-0.617115	1.08083	-0.617115	1.63076	2	-0.617115	2	-0.466135	-0.279807	1.92837	1.8256	-0.471431	-0.617115
T cell NK_XCELL***	0.913424	0.412289	0.137239	-0.015174	0.561233	1.37857	-0.508215	0.871002	-0.524153	-0.402264	-0.175129	0.314545	-0.608867	-0.468863	1.34332	-0.00544073	0.67481	-0.646107	0.290574	-1.04042	-0.810229	0.309019	0.38198	1.91315	2	0.081574	2	-1.19193	-1.12206	0.489551	-0.0942715	0.197874	-0.888811	0.93299	-0.17929	1.46401	0.416455	0.182169	0.717147	-0.456321	1.97043	1.16788	1.1671	-0.810555	1.73885	1.30939	-0.632522	0.760833	-0.00848377
Plasmacytoid dendritic cell_XCELL***	0.579448	-0.259666	-0.259666	-0.259666	-0.259666	-0.259666	-0.259666	-0.259666	-0.259666	-0.259666	-0.259666	-0.259666	-0.259666	-0.209006	0.681418	-0.259666	-0.259666	-0.259666	-0.259666	-0.259666	-0.259666	0.541177	-0.259666	-0.259666	-0.259666	-0.259666	-0.259666	0.435715	-0.259666	-0.259666	-0.259666	-0.259666	-0.259666	-0.259666	-0.259666	-0.259666	-0.259666	2	-0.259666	-0.259666	-0.259666	-0.259666	-0.259666	-0.128539	1.40082	-0.259666	-0.259666	-0.259666	-0.259666
B cell plasma_XCELL***	0.843725	-0.357979	-0.286402	1.12555	2	-0.071254	0.64607	1.00425	0.479159	0.0338506	0.415122	0.877172	1.14943	0.57971	0.0918944	0.688804	0.327184	-1.19482	1.07762	0.0800499	2	2	0.658459	0.105998	1.31256	0.723445	-0.231728	-0.370916	2	0.0188558	1.01816	0.271756	1.54164	1.2242	0.65384	0.515583	0.032139	0.390139	-1.22464	1.13543	0.186123	-0.373523	1.32128	1.71243	0.545244	0.126041	0.897206	0.810418	0.863535
T cell gamma delta_XCELL	-0.040893	-0.040893	-0.040893	-0.040893	-0.040893	-0.040893	-0.040893	-0.040893	-0.040893	-0.040893	-0.040893	-0.040893	-0.040893	-0.040893	-0.040893	-0.040893	-0.040893	-0.040893	-0.040893	-0.040893	-0.040893	-0.040893	-0.040893	-0.040893	-0.040893	-0.040893	-0.040893	-0.040893	-0.040893	-0.040893	-0.040893	-0.040893	-0.040893	-0.040893	-0.040893	-0.040893	-0.040893	-0.040893	-0.040893	-0.040893	-0.040893	-0.040893	-0.040893	-0.040893	-0.040893	-0.040893	-0.040893	-0.040893	-0.040893
T cell CD4+ Th1_XCELL	0.608571	0.0101766	1.64771	0.765633	1.04402	0.330758	1.25865	0.7712	0.170173	0.485445	1.20497	-0.0265946	0.606923	0.863415	0.98686	0.253102	0.142798	0.536097	1.55485	-0.351785	0.509541	2	-0.0758862	-0.956989	0.387607	-1.08086	0.246904	0.581997	1.65319	-0.802331	0.155375	0.337073	-0.657644	0.248199	-0.687681	-0.445074	-0.330354	2	-0.734338	-0.436147	-0.66225	0.578662	-0.224986	1.82638	2	-0.361039	-0.592866	0.193438	-0.134029
T cell CD4+ Th2_XCELL***	0.476878	-0.55235	-0.150191	0.332297	-0.597971	-0.262346	-0.482393	0.0238802	-0.387158	-0.78028	-0.500925	-0.620059	-0.0533763	-0.394071	-0.16773	-0.760965	-0.640248	-0.352494	-0.488852	-0.716251	-0.211364	-0.69831	-0.478402	-0.668904	-0.78028	-0.266435	-0.583339	-0.701038	0.0732997	-0.639977	0.0310402	-0.78028	-0.403317	-0.635445	-0.533009	-0.565558	-0.394636	-0.293779	-0.386196	-0.346943	-0.184129	-0.485055	-0.701092	0.0279217	-0.731323	-0.767982	-0.615825	-0.725344	-0.296152
T cell regulatory (Tregs)_XCELL**	-0.407776	-0.407776	-0.407776	-0.407776	-0.407776	-0.407776	-0.0296178	0.387979	-0.407776	-0.407776	-0.407776	0.0620482	-0.407776	-0.407776	0.210225	-0.407776	-0.21105	-0.407776	-0.113904	0.87822	-0.407776	-0.407776	-0.130539	-0.407776	0.603588	-0.407776	-0.407776	-0.407776	-0.36572	0.746927	-0.39219	1.25577	0.484353	-0.407776	1.40412	-0.407776	-0.407776	-0.407776	-0.407776	-0.407776	-0.146246	-0.407776	-0.407776	-0.407776	-0.407776	-0.407776	-0.407776	-0.407776	0.657375
immune score_XCELL***	-0.793833	-0.694332	-0.934564	-0.58674	-0.574564	-0.233	-0.876542	-0.891548	-0.841611	-0.632842	-0.828515	-0.0366434	-0.899597	-0.726146	-0.538814	-0.887724	-0.332304	-0.168953	-0.279525	-0.84368	-0.859872	-0.766452	0.16789	-0.342801	-0.643001	-0.923996	0.36327	-0.593548	-0.868755	-0.155503	-0.211923	-0.519079	-0.877537	-0.438322	-0.84193	-0.536192	0.206492	-0.614209	-0.285105	0.767404	-0.485015	-0.733246	-0.615746	-0.818653	-0.283488	-0.751106	-0.790593	-0.562022	0.013797
stroma score_XCELL***	-0.570458	0.573695	2	0.650026	0.955201	0.908577	1.1568	-0.504817	-0.192456	2	-0.831712	-0.111854	0.633194	-0.618128	-1.02537	-0.0320409	1.3682	1.44813	0.351104	0.555305	-0.860034	2	-0.145402	0.11651	-0.336666	-1.26531	0.404169	2	-1.05367	-0.387123	-0.962837	-0.44009	-1.03884	-0.845027	-1.15734	-0.19105	0.083596	-0.89061	-0.532235	-0.729626	-0.404513	-0.611695	0.112786	0.0530173	0.393813	2	-0.276123	-0.365588	-0.0568599
microenvironment score_XCELL***	-0.863235	-0.271833	0.321953	-0.155278	-0.00850624	0.231347	-0.148315	-0.908291	-0.729443	1.23743	-1.00741	-0.0783722	-0.401792	-0.833016	-0.8734	-0.692397	0.362557	0.523316	-0.0553123	-0.394175	-1.04412	0.41183	0.0627193	-0.209315	-0.642725	-1.27566	0.459501	0.568619	-1.13813	-0.293149	-0.595582	-0.594675	-1.13815	-0.715414	-1.16434	-0.495558	0.195358	-0.870275	-0.457496	0.257395	-0.552633	-0.83554	-0.419444	-0.60133	-0.0390998	0.553559	-0.72817	-0.59391	-0.0150771
B cell_EPIC***	0.236363	-0.27387	-0.749365	-0.537539	0.0499491	-0.562651	-0.00534221	1.12705	0.585855	-0.162872	-0.0210787	0.0094942	0.172991	0.141263	-0.74838	0.635307	-0.72416	-0.569181	-0.826595	0.244631	0.738615	-0.840759	-0.161986	-0.445544	0.236378	0.633701	-0.298064	0.301857	1.00735	0.470076	0.174247	-0.104624	1.03429	0.177029	1.08486	-0.230017	-0.880393	-0.643644	0.0674769	0.248525	-0.499462	0.203399	-0.0554172	1.05098	-0.447834	-0.261457	0.495835	0.308079	0.0390302
Cancer associated fibroblast_EPIC***	-0.163828	-0.17243	-0.181584	-0.191813	-0.178772	-0.191903	-0.141193	-0.171786	-0.214717	-0.150464	-0.185174	-0.178818	-0.187755	-0.192615	-0.181475	-0.190802	-0.205918	-0.204749	-0.165048	-0.184242	-0.193769	-0.176964	-0.108288	-0.183792	-0.063678	-0.134424	-0.162523	-0.114834	-0.171889	-0.0705872	-0.192161	-0.153291	-0.20797	-0.179573	-0.182827	-0.104753	-0.174963	-0.19467	-0.0879363	-0.159103	-0.169563	-0.143082	-0.111714	-0.175001	-0.185377	-0.110424	-0.1587	-0.0772341	-0.200008
T cell CD4+_EPIC***	0.033489	-0.409481	-0.609703	-0.678047	-0.336563	-0.763692	0.109558	1.14929	0.562915	-0.520954	-0.0759469	-0.135913	0.16945	0.312535	-0.494819	0.326869	-0.742365	-0.622703	-0.902608	0.220027	0.737522	-1.10121	-0.127121	-0.579716	0.131434	0.6738	-0.352116	-0.176549	1.09215	0.591763	-0.184359	-0.000311097	1.06128	0.0721823	1.03138	-0.339799	-1.14665	-0.850213	-0.2288	-0.0741935	-0.581861	0.153555	-0.0456628	0.783236	-0.408798	-0.28523	0.518886	0.174982	-0.349581
T cell CD8+_EPIC***	0.376653	-0.332075	-0.436373	-0.748917	-0.125939	-0.715681	0.336728	0.980018	0.442205	0.0143849	-0.327232	-0.332148	0.103373	0.0285318	-0.576461	0.507924	-0.479465	-0.581545	-0.777799	0.298949	0.445438	-0.857131	-0.174077	-0.516919	0.123776	0.725065	-0.850836	0.363242	0.778062	0.304812	0.833553	-0.317964	0.828099	0.0544196	0.846748	-0.362197	0.256632	-0.955449	-0.134319	0.432326	-0.465029	-0.103918	-0.283434	0.8798	-0.253784	-0.22562	0.471065	-0.0456922	-0.34328
Endothelial cell_EPIC***	-0.616059	-0.360514	1.64758	-0.644346	-0.317323	0.0316087	1.45508	-0.777351	0.00984	2	-0.64494	-0.145876	0.194623	-0.0123829	-0.665962	-0.409294	1.35466	0.126578	0.383338	0.620726	-0.557944	2	-0.936595	-0.460423	-0.534335	-0.603149	-0.504881	2	-0.526899	0.415896	-0.805308	-0.632773	-0.642958	-0.657814	-0.791104	-0.695004	0.179963	-0.390348	-0.589569	-0.548517	-0.461539	-0.745885	-0.210934	0.488599	0.493952	1.79983	-0.593192	-0.687954	-0.315226
Macrophage_EPIC***	-0.848757	-0.720538	-0.737607	-0.654177	-0.622513	-0.559339	-1.00471	-0.894205	-0.888718	-0.773424	-0.665929	-0.428412	-0.878299	-0.773123	-0.601629	-0.889246	-0.581989	-0.454728	-0.670625	-0.621365	-0.813247	-0.681411	0.170352	-0.50143	-0.838331	-0.754972	-0.0283233	-0.726462	-0.965527	-0.163257	-0.365987	-0.507337	-0.742036	-0.73629	-0.791845	-0.638681	-0.279714	-0.615979	-0.601534	-0.116675	-0.838388	-0.564195	-0.781158	-0.902865	-0.12134	-0.378334	-0.626533	-0.568162	-0.520304
NK cell_EPIC***	-0.133797	-0.133797	-0.133796	-0.133797	-0.133797	-0.133797	-0.133797	-0.133797	-0.133797	-0.133794	-0.133797	-0.133794	-0.133797	-0.133795	-0.133796	-0.133797	-0.133797	-0.133797	-0.133787	-0.133766	-0.133797	-0.13379	-0.133781	-0.133797	-0.133797	-0.133796	-0.133796	-0.133794	-0.133794	-0.133797	-0.133797	-0.133795	-0.133797	-0.133796	-0.133797	-0.133796	-0.133797	-0.133786	-0.133794	-0.133797	-0.133797	-0.133796	-0.133797	-0.133798	-0.133794	-0.133793	-0.133797	-0.133783	-0.133797
uncharacterized cell_EPIC***	0.670039	0.861603	-0.0306099	1.21268	0.714167	0.859475	-0.368221	0.0756375	0.101253	-0.921935	0.816531	0.483249	0.262664	0.270912	1.07703	0.410056	0.139954	0.675287	0.801383	-0.135418	0.259694	-0.199778	0.569466	0.950824	0.574171	0.208933	0.707041	-1.07555	0.0483174	-0.476185	0.595787	0.68909	0.0349597	0.69637	0.130369	0.935655	0.664897	1.19578	0.748239	0.360587	1.08175	0.63934	0.582627	-0.368922	0.157977	-0.516498	0.291588	0.55339	0.728904
[truncated: 549 more columns]
