# Supplementary material for: An integrated bioinformatic investigation of focal adhesion-related genes in glioma followed by preliminary validation of COL1A2 in tumorigenesis
Source: Aging (Albany NY). 2023 Jun 22;15(13):6225–54. doi: 10.18632/aging.204834 (PMC10373961; doi:10.18632/aging.204834)
Supplement: Supplementary Table 5 [file aging-15-204834-s006.xlsx]

## Sheet: uniCox
Supplementary Table 5. The result of univariate Cox regression analysis of 192 FARGs.
Name	HR	HR.95L	HR.95H	pvalue
ACTB	5.36819	4.10689	7.01684	9.28e-35
ACTN1	1.68215	1.53379	1.84485	2.45e-28
ACTN2	0.740623	0.63514	0.863625	0.000128011
ACTN3	0.408428	0.157764	1.05736	0.0650326
ACTN4	3.15839	2.5557	3.90321	1.83e-26
AKT1	2.08296	1.54183	2.814	1.74e-06
AKT2	2.47422	1.96704	3.11217	9.92e-15
AKT3	0.445912	0.376533	0.528073	7.96e-21
ARHGAP35	0.617738	0.523683	0.728686	1.09e-08
ARHGAP5	0.581732	0.481336	0.703068	2.08e-08
BAD	1.47133	1.10079	1.96659	0.00909044
BCAR1	0.466132	0.382307	0.568337	4.48e-14
BCL2	0.71373	0.588591	0.865474	0.000606028
BIRC2	2.64009	1.89124	3.68545	1.17e-08
BIRC3	1.87864	1.68226	2.09794	4.39e-29
BRAF	0.605971	0.472685	0.776841	7.74e-05
CAPN2	1.51645	1.13885	2.01926	0.00437367
CAV1	1.47525	1.35374	1.60766	7.57e-19
CAV2	1.87383	1.68759	2.08064	6.48e-32
CAV3	1.83014	1.42274	2.3542	2.55e-06
CCND1	0.920705	0.819831	1.03399	0.162899
CCND2	1.20983	1.05503	1.38735	0.00639331
CCND3	1.43948	1.12316	1.84489	0.00401032
CDC42	3.95534	3.18493	4.91211	1.57e-35
CHAD	1.22286	1.08546	1.37766	0.000938324
COL11A1	1.12506	1.02772	1.23161	0.0107037
COL11A2	0.540954	0.463973	0.630707	4.33e-15
COL1A1	1.38551	1.31036	1.46498	2.1e-30
COL1A2	1.51559	1.42453	1.61247	1.65e-39
COL2A1	1.2863	1.14193	1.44893	3.4e-05
COL3A1	1.39131	1.3169	1.46993	5.23e-32
COL4A1	1.53866	1.43632	1.6483	1.3e-34
COL4A2	1.5842	1.46971	1.70761	2.75e-33
COL4A4	0.713632	0.584447	0.87137	0.000928607
COL4A6	1.39225	1.20235	1.61214	9.74e-06
COL5A1	1.62193	1.50511	1.74782	7.59e-37
COL5A2	1.7361	1.5989	1.88507	2.11e-39
COL5A3	1.46636	1.29813	1.65639	7.43e-10
COL6A1	1.97009	1.7644	2.19976	1.88e-33
COL6A2	1.53642	1.44181	1.63724	4.92e-40
COL6A3	1.47847	1.37139	1.59391	2.12e-24
COL6A6	0.0660866	0.00771527	0.566077	0.0131665
COMP	1.77159	1.38496	2.26614	5.3e-06
CRK	2.51781	1.71588	3.69452	2.36e-06
CRKL	0.471147	0.363649	0.610424	1.23e-08
CTNNB1	3.90219	2.84061	5.36049	4.3e-17
DIAPH1	2.51661	2.03741	3.10851	1.1e-17
DOCK1	0.664056	0.555346	0.794047	7.18e-06
EGF	1.85534	1.5411	2.23365	6.67e-11
EGFR	1.26064	1.15999	1.37003	4.87e-08
ELK1	2.21971	1.80139	2.73518	7.2e-14
ERBB2	2.40796	2.04875	2.83015	1.54e-26
FLNA	1.88701	1.67139	2.13043	1.1e-24
FLNB	0.579225	0.476523	0.704062	4.17e-08
FLNC	1.55304	1.44291	1.67157	8.84e-32
FLT1	0.774429	0.629586	0.952595	0.0155349
FLT4	1.56449	1.333	1.8362	4.3e-08
FN1	1.6573	1.526	1.7999	3.72e-33
FYN	0.562902	0.454555	0.697073	1.38e-07
GRB2	1.04854	0.701647	1.56694	0.817108
GSK3B	0.63529	0.509771	0.791714	5.35e-05
HGF	1.56741	1.41734	1.73336	2.09e-18
HRAS	1.23645	0.927669	1.64801	0.14767
IBSP	1.401	1.32846	1.47751	1.8e-35
IGF1	1.68013	0.980913	2.87776	0.0587878
IGF1R	0.543616	0.463297	0.63786	7.88e-14
ILK	2.19768	1.64995	2.92723	7.3e-08
ITGA1	2.01981	1.75312	2.32707	2.24e-22
ITGA10	1.77674	1.49285	2.11461	9.74e-11
ITGA11	2.60441	2.14679	3.15959	2.76e-22
ITGA2	1.83233	1.62447	2.06679	6.36e-23
ITGA2B	0.584226	0.436745	0.78151	0.000293756
ITGA3	1.83988	1.655	2.04542	1.57e-29
ITGA4	2.08076	1.82935	2.36672	6.96e-29
ITGA5	1.98735	1.79675	2.19817	1.16e-40
ITGA6	1.82047	1.49833	2.21187	1.64e-09
ITGA7	1.93821	1.71752	2.18726	7.4e-27
ITGA8	1.18854	1.01872	1.38667	0.0281105
ITGA9	0.798506	0.656256	0.97159	0.024583
ITGAV	1.7609	1.43284	2.16407	7.49e-08
ITGB1	2.30419	1.96994	2.69515	1.65e-25
ITGB4	1.38459	1.25631	1.52597	5.39e-11
ITGB5	1.78327	1.50545	2.11236	2.17e-11
ITGB7	2.92244	2.34789	3.6376	7.84e-22
ITGB8	1.80883	1.53995	2.12467	5.27e-13
JUN	1.6209	1.42547	1.84313	1.74e-13
KDR	1.36751	1.16384	1.60681	0.000142324
LAMA1	1.27505	1.09565	1.48382	0.00168527
LAMA2	2.04236	1.82118	2.29039	2.71e-34
LAMA3	0.759341	0.566101	1.01854	0.0661591
LAMA4	1.80054	1.56571	2.07058	1.61e-16
LAMA5	1.30109	1.08399	1.56167	0.00471548
LAMB1	1.7035	1.55593	1.86506	1.02e-30
LAMB2	2.3145	1.94948	2.74788	9.41e-22
LAMB3	1.17288	0.990488	1.38885	0.0644386
LAMB4	4.04221	2.91924	5.59716	4.05e-17
LAMC1	2.11155	1.88724	2.36253	6.89e-39
LAMC2	1.77927	1.35056	2.34406	4.19e-05
LAMC3	1.68443	1.48702	1.90805	2.43e-16
MAP2K1	0.972393	0.754798	1.25272	0.828512
MAPK1	0.590923	0.46064	0.758055	3.48e-05
MAPK10	0.444392	0.378866	0.521251	2.17e-23
MAPK3	0.464968	0.312941	0.690852	0.00015028
MAPK8	0.286761	0.231119	0.3558	7.49e-30
MAPK9	0.387277	0.286271	0.523922	7.63e-10
MET	1.37751	1.28429	1.47749	3.28e-19
MYL12A	2.69338	2.34756	3.09015	2.44e-45
MYL12B	3.7845	3.07246	4.66155	6.19e-36
MYL5	1.5854	1.25763	1.9986	9.63e-05
MYL7	1.97713	1.51513	2.58	5.17e-07
MYL9	1.59475	1.45564	1.74714	1.21e-23
MYLK	1.40356	1.21719	1.61846	3.1e-06
MYLK2	1.13616	0.902379	1.43052	0.277453
MYLK3	0.462605	0.312935	0.683859	0.000110907
MYLPF	4.41049	3.0825	6.31061	4.7e-16
PAK1	1.16707	1.04994	1.29727	0.00419645
PAK2	1.16641	0.891479	1.52613	0.261702
PAK3	0.606728	0.541556	0.679742	6.79e-18
PAK4	2.42209	1.8777	3.12431	9.72e-12
PAK5	0.521554	0.463024	0.587483	8.37e-27
PAK6	0.74951	0.541986	1.03649	0.081289
PARVA	1.71417	1.43978	2.04086	1.4e-09
PARVB	2.07851	1.75661	2.45939	1.56e-17
PARVG	1.86063	1.60073	2.16274	6.04e-16
PDGFA	1.92387	1.73721	2.13058	3.23e-36
PDGFB	1.78579	1.48631	2.14561	5.96e-10
PDGFC	1.18343	0.982162	1.42594	0.0766072
PDGFD	1.68632	1.53539	1.85208	8.95e-28
PDGFRA	0.811118	0.744526	0.883665	1.67e-06
PDGFRB	2.0945	1.7553	2.49925	2.37e-16
PDPK1	0.68405	0.522234	0.896006	0.00582773
PGF	0.783866	0.701067	0.876445	1.91e-05
PIK3CA	0.763167	0.622475	0.935658	0.00933227
PIK3CB	0.479636	0.370792	0.620431	2.21e-08
PIK3CD	1.58516	1.37208	1.83133	3.98e-10
PIK3CG	1.80021	1.54604	2.09617	3.72e-14
PIK3R1	0.535384	0.459015	0.624459	1.77e-15
PIK3R3	1.62026	1.34021	1.95884	6.22e-07
PIK3R5	1.64798	1.41314	1.92185	1.91e-10
PIP5K1C	1.05458	0.837558	1.32784	0.651213
PPP1CA	3.67569	2.94789	4.58318	6.35e-31
PPP1CB	3.41292	2.72974	4.26708	4.68e-27
PPP1CC	2.62995	1.87571	3.68748	2.05e-08
PPP1R12A	0.634778	0.500018	0.805857	0.000189352
PRKCA	0.452448	0.384716	0.532106	9.23e-22
PRKCB	0.65295	0.582909	0.731407	1.8e-13
PRKCG	0.777376	0.707481	0.854175	1.61e-07
PTEN	0.336545	0.253397	0.446977	5.41e-14
PTK2	0.611231	0.461657	0.809266	0.000586276
PXN	2.64952	2.00565	3.50009	6.91e-12
RAC1	6.21496	4.26972	9.04645	1.45e-21
RAC2	2.02	1.79231	2.27662	1.01e-30
RAC3	0.560621	0.483097	0.650587	2.51e-14
RAF1	1.12154	0.801697	1.56898	0.503101
RAP1A	4.36948	3.14067	6.07906	2.08e-18
RAP1B	3.454	2.93125	4.06998	1.38e-49
RAPGEF1	0.755432	0.594571	0.959813	0.021693
RASGRF1	0.604738	0.543544	0.672821	2.46e-20
RELN	0.699009	0.609347	0.801865	3.18e-07
RHOA	7.13437	4.76272	10.687	1.57e-21
ROCK1	0.962346	0.783327	1.18228	0.714749
ROCK2	1.0184	0.795864	1.30315	0.884783
SHC1	2.28002	2.02039	2.573	1.01e-40
SHC2	0.46119	0.388612	0.547322	8.07e-19
SHC3	0.882429	0.807992	0.963723	0.0054062
SHC4	1.34566	1.12789	1.60547	0.00098019
SOS1	0.690068	0.539403	0.882817	0.00316065
SOS2	0.42835	0.339757	0.540044	7.42e-13
SPP1	1.65987	1.5344	1.79559	1.33e-36
SRC	0.556337	0.442456	0.699529	5.22e-07
THBS1	1.40798	1.31643	1.50591	1.98e-23
THBS2	1.40352	1.1995	1.64224	2.34e-05
THBS3	1.9989	1.72294	2.31905	6.41e-20
THBS4	1.52114	1.39284	1.66126	1.06e-20
TLN1	1.52987	1.21131	1.93221	0.000358088
TLN2	0.795508	0.668864	0.946132	0.00971389
TNC	1.75648	1.59064	1.93961	8.7e-29
TNN	1.40299	1.15891	1.69847	0.000515842
TNR	0.671234	0.629641	0.715574	2.61e-34
TNXB	1.25358	1.03997	1.51107	0.0177321
VASP	3.34548	2.70618	4.1358	6.35e-29
VAV1	1.56151	1.3513	1.80442	1.53e-09
VAV2	1.1099	0.88695	1.38888	0.362104
VAV3	1.91904	1.7536	2.10009	1.39e-45
VCL	1.45917	1.25255	1.69987	1.23e-06
VEGFA	1.60778	1.49534	1.72868	1.02e-37
VEGFB	2.16016	1.62757	2.86703	9.7e-08
VEGFC	1.36851	1.14239	1.63938	0.000662269
VEGFD	1.7244	1.22985	2.41783	0.00157942
VWF	1.56599	1.39589	1.75681	2.09e-14
XIAP	0.705146	0.506384	0.981925	0.0386461
ZYX	2.52534	2.20063	2.89796	9.73e-40
