# Supplementary material for: An integrated bioinformatic investigation of focal adhesion-related genes in glioma followed by preliminary validation of COL1A2 in tumorigenesis
Source: Aging (Albany NY). 2023 Jun 22;15(13):6225–54. doi: 10.18632/aging.204834 (PMC10373961; doi:10.18632/aging.204834)
Supplement: Supplementary Table 6 [file aging-15-204834-s007.xlsx]

## Sheet: TCGA cohort
Supplementary Table 6. Calculation of AUC value under ROC curves.
1. TCGA cohort-GBMLGG: AUC values of different clinical factors in predicting 1-, 3-, and 5-year OS
	AUC Value
Clinical factor	1 year	3 years	5 years
riskscore	0.915	0.912	0.89
age	0.825	0.838	0.796
gender	0.502	0.485	0.526
grade	0.814	0.839	0.83
1p19q	0.362	0.379	0.362
IDH	0.153	0.133	0.182
2. TCGA cohort-LGG: AUC values of different clinical factors in predicting 1-, 3-, and 5-year OS
	AUC Value
Clinical factor	1 year	3 years	5 years
riskscore	0.922	0.833	0.791
age	0.809	0.792	0.728
gender	0.476	0.459	0.517
grade	0.685	0.685	0.675
1p19q	0.363	0.418	0.392
IDH	0.153	0.214	0.299
3. TCGA cohort-GBM: AUC values of different clinical factors in predicting 1-, 3-, and 5-year OS
	AUC Value
Clinical factor	1 year	3 years	5 years
riskscore	0.729	0.765	NA
age	0.643	0.756	NA
gender	0.467	0.406	NA
1p19q	0.5	0.5	NA
IDH	0.439	0.324	NA
4. TCGA cohort-IDH mutation: AUC values of different clinical factors in predicting 1-, 3-, and 5-year OS
	AUC Value
Clinical factor	1 year	3 years	5 years
riskscore	0.835	0.654	0.687
age	0.61	0.66	0.596
gender	0.221	0.417	0.536
grade	0.516	0.693	0.675
1p19q	0.538	0.505	0.422
5. TCGA cohort-IDH wildtype: AUC values of different clinical factors in predicting 1-, 3-, and 5-year OS
	AUC Value
Clinical factor	1 year	3 years	5 years
riskscore	0.74	0.766	0.901
age	0.667	0.721	0.979
gender	0.501	0.586	0.787
grade	0.619	0.623	0.797
1p19q	0.5	0.5	0.5
6. TCGA cohort-GBMLGG: AUC values of different clinical factors in predicting 1-, 3-, and 5-year PFS
	AUC Value
Clinical factor	1 year	3 years	5 years
riskscore	0.841	0.809	0.845
age	0.735	0.713	0.71
gender	0.518	0.472	0.448
grade	0.777	0.722	0.733
1p19q	0.373	0.393	0.328
IDH	0.214	0.225	0.245
7. TCGA cohort-IDH mutation: AUC values of different clinical factors in predicting 1-, 3-, and 5-year PFS
	AUC Value
Clinical factor	1 year	3 years	5 years
riskscore	0.69	0.55	0.668
age	0.508	0.522	0.543
gender	0.413	0.422	0.418
grade	0.606	0.501	0.547
1p19q	0.457	0.481	0.371
8. TCGA cohort-IDH wildtype: AUC values of different clinical factors in predicting 1-, 3-, and 5-year PFS
	AUC Value
Clinical factor	1 year	3 years	5 years
riskscore	0.611	0.774	NA
age	0.597	0.629	NA
gender	0.569	0.567	NA
grade	0.569	0.567	NA
1p19q	0.5	0.5	NA

## Sheet: CGGA cohort
1. CGGA cohort-GBMLGG: AUC values of different clinical factors in predicting 1-, 3-, and 5-year OS
	AUC Value
Clinical factor	1 year	3 years	5 years
riskscore	0.719	0.773	0.792
age	0.613	0.63	0.621
gender	0.486	0.522	0.513
grade	0.757	0.801	0.794
1p19q	0.377	0.347	0.313
IDH	0.311	0.289	0.295
2. CGGA cohort-LGG: AUC values of different clinical factors in predicting 1-, 3-, and 5-year OS
	AUC Value
Clinical factor	1 year	3 years	5 years
riskscore	0.685	0.732	0.738
age	0.489	0.55	0.548
gender	0.447	0.506	0.5
grade	0.665	0.685	0.666
1p19q	0.372	0.343	0.311
IDH	0.365	0.362	0.39
3. CGGA cohort-GBM: AUC values of different clinical factors in predicting 1-, 3-, and 5-year OS
	AUC Value
Clinical factor	1 year	3 years	5 years
riskscore	0.569	0.591	0.67
age	0.562	0.552	0.501
gender	0.495	0.548	0.534
1p19q	0.464	0.494	0.503
IDH	0.447	0.456	0.412
4. CGGA cohort-IDH mutation: AUC values of different clinical factors in predicting 1-, 3-, and 5-year OS
	AUC Value
Clinical factor	1 year	3 years	5 years
riskscore	0.699	0.729	0.752
age	0.457	0.502	0.475
gender	0.457	0.502	0.475
grade	0.752	0.766	0.737
1p19q	0.353	0.341	0.305
5. CGGA cohort-IDH wildtype: AUC values of different clinical factors in predicting 1-, 3-, and 5-year OS
	AUC Value
Clinical factor	1 year	3 years	5 years
riskscore	0.584	0.639	0.686
age	0.587	0.644	0.685
gender	0.506	0.548	0.539
grade	0.641	0.702	0.756
1p19q	0.487	0.5	0.5

## Sheet: GSE16011 cohort
1. GSE16011 cohort-GBMLGG: AUC values of different clinical factors in predicting 1-, 3-, and 5-year OS
	AUC Value
Clinical factor	1 year	3 years	5 years
riskscore	0.814	0.898	0.862
age	0.743	0.748	0.729
gender	0.536	0.477	0.492
grade	0.722	0.779	0.745
1p19q	0.31	0.244	0.272
IDH	0.358	0.278	0.322
2. GSE16011 cohort-LGG: AUC values of different clinical factors in predicting 1-, 3-, and 5-year OS
	AUC Value
Clinical factor	1 year	3 years	5 years
riskscore	0.941	0.816	0.734
age	0.747	0.686	0.659
gender	0.581	0.44	0.482
grade	0.614	0.56	0.467
1p19q	0.273	0.268	0.299
IDH	0.331	0.385	0.467
3. GSE16011 cohort-GBM: AUC values of different clinical factors in predicting 1-, 3-, and 5-year OS
	AUC Value
Clinical factor	1 year	3 years	5 years
riskscore	0.65	0.871	848
age	0.727	0.788	0.78
gender	0.529	0.522	0.519
1p19q	0.427	0.346	0.419
IDH	0.432	0.179	0.179
4. GSE16011 cohort-IDH mutation: AUC values of different clinical factors in predicting 1-, 3-, and 5-year OS
	AUC Value
Clinical factor	1 year	3 years	5 years
riskscore	0.878	0.821	0.802
age	0.792	0.627	0.587
gender	0.43	0.463	0.507
grade	0.764	0.7	0.586
1p19q	0.226	0.254	0.356
5. TCGA cohort-IDH wildtype: AUC values of different clinical factors in predicting 1-, 3-, and 5-year OS
	AUC Value
Clinical factor	1 year	3 years	5 years
riskscore	0.715	0.884	0.869
age	0.702	0.839	0.866
gender	0.528	0.463	0.438
grade	0.654	0.864	0.865
1p19q	0.38	0.283	0.198
