# Supplementary material for: An integrated bioinformatic investigation of focal adhesion-related genes in glioma followed by preliminary validation of COL1A2 in tumorigenesis
Source: Aging (Albany NY). 2023 Jun 22;15(13):6225–54. doi: 10.18632/aging.204834 (PMC10373961; doi:10.18632/aging.204834)
Supplement: Supplementary Table 7 [file aging-15-204834-s008.xlsx]

## Sheet: Sheet1
Supplementary Table 7. Differences in functional pathways between high and low risk groups.
id	logFC	AveExpr	t	P.Value	adj.P.Val	B
KEGG_TERPENOID_BACKBONE_BIOSYNTHESIS	-0.315435	-0.0066868	-19.9025	2.65357e-80	1.54078e-79	171.975
KEGG_PROPANOATE_METABOLISM	-0.191306	0.00565186	-16.2582	8.54678e-56	3.07684e-55	115.757
KEGG_LONG_TERM_POTENTIATION	-0.184161	-0.00257671	-16.0025	3.28119e-54	1.15807e-53	112.126
KEGG_LONG_TERM_DEPRESSION	-0.167891	0.00950683	-16.5812	8.01574e-58	3.13659e-57	120.406
KEGG_PHOSPHATIDYLINOSITOL_SIGNALING_SYSTEM	-0.164475	-0.003057	-15.1849	2.82991e-49	8.48972e-49	100.815
KEGG_TASTE_TRANSDUCTION	-0.163522	0.0136642	-15.3806	1.94332e-50	6.2464e-50	103.48
KEGG_BUTANOATE_METABOLISM	-0.159512	0.0081242	-13.7761	3.00136e-41	8.06335e-41	82.4347
KEGG_NEUROACTIVE_LIGAND_RECEPTOR_INTERACTION	-0.157379	0.0119616	-14.8802	1.73582e-47	5.03948e-47	96.7191
KEGG_WNT_SIGNALING_PATHWAY	-0.146547	0.00377988	-18.5069	1.64871e-70	8.02074e-70	149.503
KEGG_LYSINE_DEGRADATION	-0.146232	0.000793864	-15.4834	4.70647e-51	1.5403e-50	104.891
KEGG_INOSITOL_PHOSPHATE_METABOLISM	-0.145418	-0.000145745	-15.2259	1.61807e-49	5.02161e-49	101.371
KEGG_GLYOXYLATE_AND_DICARBOXYLATE_METABOLISM	-0.134974	0.00399503	-12.2585	2.55136e-33	6.20601e-33	64.2943
KEGG_CARDIAC_MUSCLE_CONTRACTION	-0.128704	-0.00213869	-10.0591	3.10433e-23	6.20867e-23	41.2696
KEGG_PROXIMAL_TUBULE_BICARBONATE_RECLAMATION	-0.128701	0.00783587	-9.20524	8.61693e-20	1.65005e-19	33.4285
KEGG_CALCIUM_SIGNALING_PATHWAY	-0.128303	-0.00023185	-12.1339	1.0559e-32	2.4367e-32	62.8842
KEGG_BIOSYNTHESIS_OF_UNSATURATED_FATTY_ACIDS	-0.126217	0.0129892	-10.5116	3.61605e-25	7.48149e-25	45.6785
KEGG_STEROID_HORMONE_BIOSYNTHESIS	-0.12615	0.0104756	-10.9013	6.81509e-27	1.44319e-26	49.6137
KEGG_RIBOSOME	-0.115563	0.0184766	-5.56708	2.9539e-08	4.21985e-08	7.3545
KEGG_ALANINE_ASPARTATE_AND_GLUTAMATE_METABOLISM	-0.114795	0.00326881	-11.0416	1.58185e-27	3.38968e-27	51.0615
KEGG_SELENOAMINO_ACID_METABOLISM	-0.108812	-0.00322335	-11.7605	6.91465e-31	1.5558e-30	58.7337
KEGG_GLYCEROLIPID_METABOLISM	-0.106684	0.000101682	-14.8567	2.38043e-47	6.69496e-47	96.4049
KEGG_AMYOTROPHIC_LATERAL_SCLEROSIS_ALS	-0.100014	-0.00191506	-11.7842	5.32021e-31	1.2122e-30	58.9939
KEGG_DORSO_VENTRAL_AXIS_FORMATION	-0.0936936	0.00427381	-8.20033	4.32841e-16	7.56422e-16	25.0202
KEGG_ERBB_SIGNALING_PATHWAY	-0.0915176	-0.0010932	-9.92821	1.08994e-22	2.15593e-22	40.0266
KEGG_MELANOGENESIS	-0.0899076	0.000299431	-11.7493	7.82381e-31	1.73862e-30	58.6112
KEGG_BETA_ALANINE_METABOLISM	-0.08936	0.0125683	-8.97137	6.77487e-19	1.25719e-18	31.3918
KEGG_STEROID_BIOSYNTHESIS	-0.088905	-0.00269929	-5.7064	1.33321e-08	1.98328e-08	8.12662
KEGG_MTOR_SIGNALING_PATHWAY	-0.0873256	-0.00820176	-9.78821	4.10904e-22	8.03943e-22	38.7136
KEGG_HEDGEHOG_SIGNALING_PATHWAY	-0.0838554	0.0085646	-10.1022	2.04619e-23	4.13836e-23	41.6822
KEGG_TYPE_II_DIABETES_MELLITUS	-0.0818682	-0.00463301	-7.72034	1.85093e-14	3.17302e-14	21.3233
KEGG_OLFACTORY_TRANSDUCTION	-0.0811679	0.0123714	-6.71058	2.54132e-11	4.04812e-11	14.2343
KEGG_NON_HOMOLOGOUS_END_JOINING	-0.0769392	-0.0177496	-5.17645	2.49735e-07	3.48467e-07	5.28834
KEGG_BASAL_CELL_CARCINOMA	-0.0715064	0.00158103	-8.23878	3.17566e-16	5.60411e-16	25.3253
KEGG_ENDOMETRIAL_CANCER	-0.0702383	-0.00227	-6.90914	6.60307e-12	1.0805e-11	15.554
KEGG_PYRUVATE_METABOLISM	-0.0701926	0.00674993	-6.69954	2.73607e-11	4.32011e-11	14.1621
KEGG_VALINE_LEUCINE_AND_ISOLEUCINE_DEGRADATION	-0.0688495	0.00746594	-6.04679	1.7703e-09	2.65545e-09	10.0905
KEGG_GNRH_SIGNALING_PATHWAY	-0.0564852	-0.00359329	-6.68136	3.08941e-11	4.79392e-11	14.0432
KEGG_ALDOSTERONE_REGULATED_SODIUM_REABSORPTION	-0.0552712	0.0040918	-4.99462	6.42736e-07	8.83149e-07	4.37647
KEGG_HISTIDINE_METABOLISM	-0.0543256	0.00789436	-5.62305	2.15039e-08	3.1126e-08	7.6625
KEGG_FATTY_ACID_METABOLISM	-0.0524056	0.00805868	-4.87545	1.17461e-06	1.57784e-06	3.79603
KEGG_NOTCH_SIGNALING_PATHWAY	-0.0452754	-0.00330681	-4.35447	1.40394e-05	1.82171e-05	1.41948
KEGG_GLYCEROPHOSPHOLIPID_METABOLISM	-0.0448986	-0.00196507	-6.47361	1.21094e-10	1.83167e-10	12.7076
KEGG_TGF_BETA_SIGNALING_PATHWAY	-0.0442003	0.00311228	-4.7852	1.8382e-06	2.45093e-06	3.36556
KEGG_ABC_TRANSPORTERS	-0.0437028	0.00428425	-4.92388	9.2082e-07	1.24622e-06	4.03025
KEGG_ONE_CARBON_POOL_BY_FOLATE	-0.0415944	-0.0108978	-3.65267	0.000266468	0.000333085	-1.36527
KEGG_THYROID_CANCER	-0.0409863	0.000180599	-4.55133	5.66372e-06	7.44139e-06	2.28663
KEGG_BASAL_TRANSCRIPTION_FACTORS	-0.0387953	-0.00850805	-3.402	0.000682624	0.000841591	-2.24327
KEGG_GAP_JUNCTION	-0.03667	0.000688278	-3.88352	0.000106429	0.00013491	-0.502249
KEGG_ALPHA_LINOLENIC_ACID_METABOLISM	-0.033547	0.0168151	-2.70281	0.00693598	0.00832317	-4.36586
KEGG_TIGHT_JUNCTION	-0.0328718	0.00374663	-5.19695	2.24049e-07	3.15069e-07	5.39317
KEGG_ADIPOCYTOKINE_SIGNALING_PATHWAY	-0.0312146	0.00188476	-3.82357	0.000135716	0.000170832	-0.731379
KEGG_GLYCINE_SERINE_AND_THREONINE_METABOLISM	-0.025636	0.00795176	-2.4274	0.0152985	0.0178814	-5.0695
KEGG_VASOPRESSIN_REGULATED_WATER_REABSORPTION	-0.0210383	-0.000969771	-2.3105	0.0209659	0.0241914	-5.34548
KEGG_FC_EPSILON_RI_SIGNALING_PATHWAY	0.0226523	0.00521006	2.59874	0.00942807	0.0111648	-4.64057
KEGG_INSULIN_SIGNALING_PATHWAY	0.0230598	-0.00282957	3.15651	0.00162139	0.00198538	-3.04336
KEGG_HUNTINGTONS_DISEASE	0.0240705	0.00102454	2.3473	0.0190108	0.022077	-5.26006
KEGG_COLORECTAL_CANCER	0.0277651	-0.00464602	2.69329	0.00713646	0.00850704	-4.39144
KEGG_CHRONIC_MYELOID_LEUKEMIA	0.0303128	-0.00363295	2.90636	0.00369843	0.00449809	-3.79765
KEGG_DRUG_METABOLISM_CYTOCHROME_P450	0.0318816	0.0143796	2.8353	0.00462607	0.00558854	-4.00065
KEGG_MELANOMA	0.03469	0.00209757	5.0087	5.98048e-07	8.28066e-07	4.44591
KEGG_PARKINSONS_DISEASE	0.037852	0.00799739	2.545	0.0110051	0.0129472	-4.77822
KEGG_ACUTE_MYELOID_LEUKEMIA	0.0382571	-0.00742979	4.35403	1.40677e-05	1.82171e-05	1.41757
KEGG_UBIQUITIN_MEDIATED_PROTEOLYSIS	0.0389266	-0.00871359	4.27908	1.96875e-05	2.53125e-05	1.09735
KEGG_MATURITY_ONSET_DIABETES_OF_THE_YOUNG	0.0392832	0.0100039	3.55021	0.000394167	0.00048931	-1.73159
KEGG_CYSTEINE_AND_METHIONINE_METABOLISM	0.0397821	0.00462254	5.23612	1.819e-07	2.57812e-07	5.59452
KEGG_NEUROTROPHIN_SIGNALING_PATHWAY	0.0404542	-0.000766051	4.71851	2.54686e-06	3.37084e-06	3.0525
KEGG_PURINE_METABOLISM	0.0425048	-0.00854301	7.62746	3.73851e-14	6.34842e-14	20.6321
KEGG_HYPERTROPHIC_CARDIOMYOPATHY_HCM	0.0446837	-0.00174156	5.65236	1.81903e-08	2.6628e-08	7.82493
KEGG_TRYPTOPHAN_METABOLISM	0.0514509	0.0102579	5.6523	1.81958e-08	2.6628e-08	7.82464
KEGG_SULFUR_METABOLISM	0.0517275	-0.00494668	4.01715	6.11699e-05	7.80892e-05	0.0210815
KEGG_GLYCOSAMINOGLYCAN_BIOSYNTHESIS_CHONDROITIN_SULFATE	0.0556507	-0.0118436	4.95754	7.765e-07	1.05886e-06	4.19437
KEGG_GLYCOSAMINOGLYCAN_BIOSYNTHESIS_HEPARAN_SULFATE	0.0563229	-0.000983269	5.62215	2.16152e-08	3.1126e-08	7.65749
KEGG_PEROXISOME	0.0594035	0.00135897	6.68175	3.0812e-11	4.79392e-11	14.0458
KEGG_DRUG_METABOLISM_OTHER_ENZYMES	0.0621676	-0.00311573	6.4842	1.13054e-10	1.72454e-10	12.7747
KEGG_PPAR_SIGNALING_PATHWAY	0.0639472	0.00999707	6.80554	1.33991e-11	2.15343e-11	14.8609
KEGG_FRUCTOSE_AND_MANNOSE_METABOLISM	0.0652184	-0.00230524	7.14626	1.26012e-12	2.08093e-12	17.1777
KEGG_TYROSINE_METABOLISM	0.0652302	0.00182431	6.86564	8.89842e-12	1.44299e-11	15.2617
KEGG_PROSTATE_CANCER	0.0669303	-0.00430668	8.1899	4.70699e-16	8.14671e-16	24.9376
KEGG_VEGF_SIGNALING_PATHWAY	0.0671723	0.00045903	9.14971	1.41203e-19	2.67543e-19	32.9406
KEGG_SNARE_INTERACTIONS_IN_VESICULAR_TRANSPORT	0.0737033	-0.000646622	9.12973	1.68566e-19	3.16061e-19	32.7656
KEGG_ARRHYTHMOGENIC_RIGHT_VENTRICULAR_CARDIOMYOPATHY_ARVC	0.0740487	-0.00219129	8.62702	1.2938e-17	2.32885e-17	28.4807
KEGG_O_GLYCAN_BIOSYNTHESIS	0.077828	0.00134725	7.56711	5.87846e-14	9.889e-14	20.1872
KEGG_GLYCOSPHINGOLIPID_BIOSYNTHESIS_GANGLIO_SERIES	0.0804464	-0.0171079	6.53993	7.86316e-11	1.20972e-10	13.1296
KEGG_ARACHIDONIC_ACID_METABOLISM	0.0819036	0.00828741	7.42061	1.73987e-13	2.89978e-13	19.1211
KEGG_ADHERENS_JUNCTION	0.0834277	-0.00187089	8.53328	2.83622e-17	5.05465e-17	27.7065
KEGG_EPITHELIAL_CELL_SIGNALING_IN_HELICOBACTER_PYLORI_INFECTION	0.0835876	-0.000291027	11.4897	1.33748e-29	2.93593e-29	55.7947
KEGG_PATHWAYS_IN_CANCER	0.0912044	-0.00274381	13.5601	4.49047e-40	1.17143e-39	79.7452
KEGG_RENAL_CELL_CARCINOMA	0.0954	-0.00377064	9.45426	9.10297e-21	1.76186e-20	35.6499
KEGG_RIBOFLAVIN_METABOLISM	0.10443	-0.00986589	10.3998	1.10366e-24	2.25749e-24	44.5733
KEGG_ETHER_LIPID_METABOLISM	0.110256	0.00512103	11.3701	4.85946e-29	1.05386e-28	54.5151
KEGG_VIBRIO_CHOLERAE_INFECTION	0.110368	0.00122569	13.1496	6.97406e-38	1.76807e-37	74.7309
KEGG_ARGININE_AND_PROLINE_METABOLISM	0.111683	0.0063783	12.2194	3.99018e-33	9.57644e-33	63.8503
KEGG_BASE_EXCISION_REPAIR	0.118889	-0.0159321	8.76893	3.88546e-18	7.06446e-18	29.6676
KEGG_PYRIMIDINE_METABOLISM	0.120157	-0.0135838	12.3953	5.29365e-34	1.30528e-33	65.8559
KEGG_PRIMARY_BILE_ACID_BIOSYNTHESIS	0.124314	0.00772808	8.957	7.67875e-19	1.41038e-18	31.2681
KEGG_NUCLEOTIDE_EXCISION_REPAIR	0.127691	-0.0122064	10.661	8.00581e-26	1.67564e-25	47.1723
KEGG_RIG_I_LIKE_RECEPTOR_SIGNALING_PATHWAY	0.128104	-0.0120263	15.6775	3.1754e-52	1.07844e-51	107.574
KEGG_CHEMOKINE_SIGNALING_PATHWAY	0.129123	-0.000127669	15.8806	1.83702e-53	6.35893e-53	110.411
KEGG_T_CELL_RECEPTOR_SIGNALING_PATHWAY	0.138558	-0.00736457	15.5648	1.52446e-51	5.08153e-51	106.013
KEGG_PANCREATIC_CANCER	0.140076	-0.00180766	14.7524	9.58006e-47	2.65294e-46	95.0197
KEGG_PRION_DISEASES	0.142191	0.0026908	15.1237	6.50569e-49	1.91971e-48	99.9864
KEGG_GLYCOSYLPHOSPHATIDYLINOSITOL_GPI_ANCHOR_BIOSYNTHESIS	0.142191	-0.0148633	13.5268	6.7937e-40	1.74695e-39	79.3337
KEGG_PORPHYRIN_AND_CHLOROPHYLL_METABOLISM	0.143642	-0.0115722	12.9299	9.83722e-37	2.4593e-36	72.1014
KEGG_NOD_LIKE_RECEPTOR_SIGNALING_PATHWAY	0.144621	-0.00482688	13.7146	6.50512e-41	1.72194e-40	81.6657
KEGG_NICOTINATE_AND_NICOTINAMIDE_METABOLISM	0.147078	-0.00920733	16.3879	1.32207e-56	4.85657e-56	117.615
KEGG_RENIN_ANGIOTENSIN_SYSTEM	0.151784	-0.00560412	12.1509	8.70771e-33	2.03557e-32	63.0756
KEGG_BLADDER_CANCER	0.153527	-0.00480336	18.6146	3.01363e-71	1.50682e-70	151.196
KEGG_B_CELL_RECEPTOR_SIGNALING_PATHWAY	0.15648	-0.00414553	15.2677	9.13544e-50	2.88487e-49	101.94
KEGG_SMALL_CELL_LUNG_CANCER	0.159718	-0.0112687	17.754	1.97685e-65	8.67886e-65	137.852
KEGG_GLYCOLYSIS_GLUCONEOGENESIS	0.166165	0.00361234	17.3851	5.37097e-63	2.24831e-62	132.27
KEGG_REGULATION_OF_ACTIN_CYTOSKELETON	0.16627	-0.00202551	23.5526	5.40885e-108	6.08496e-107	235.548
KEGG_GLYCOSPHINGOLIPID_BIOSYNTHESIS_GLOBO_SERIES	0.169681	-0.0181085	14.8704	1.97969e-47	5.65625e-47	96.5883
KEGG_FC_GAMMA_R_MEDIATED_PHAGOCYTOSIS	0.170197	1.34087e-05	16.9948	1.83778e-60	7.51819e-60	126.458
KEGG_HOMOLOGOUS_RECOMBINATION	0.176389	-0.0172954	12.1729	6.78128e-33	1.60609e-32	63.3238
KEGG_PANTOTHENATE_AND_COA_BIOSYNTHESIS	0.176595	-0.00561895	16.853	1.49438e-59	5.97754e-59	124.371
KEGG_CELL_CYCLE	0.185417	-0.0169311	15.1919	2.57205e-49	7.84693e-49	100.91
KEGG_APOPTOSIS	0.186029	-0.00919414	20.6915	4.80029e-86	3.20019e-85	185.155
KEGG_CYTOSOLIC_DNA_SENSING_PATHWAY	0.189189	-0.0104773	16.479	3.53592e-57	1.35418e-56	118.928
KEGG_PENTOSE_PHOSPHATE_PATHWAY	0.197283	-0.00183522	20.2804	4.9089e-83	3.0469e-82	178.247
KEGG_NATURAL_KILLER_CELL_MEDIATED_CYTOTOXICITY	0.205903	-0.00563283	21.4849	5.82371e-92	5.24134e-91	198.736
KEGG_P53_SIGNALING_PATHWAY	0.205961	-0.0107407	21.4282	1.56003e-91	1.33717e-90	197.754
KEGG_CELL_ADHESION_MOLECULES_CAMS	0.210371	-0.0031572	21.1901	9.54553e-90	6.87278e-89	193.652
KEGG_FOCAL_ADHESION	0.217108	-0.0105067	25.012	8.56021e-120	1.28403e-118	262.649
KEGG_JAK_STAT_SIGNALING_PATHWAY	0.21786	-0.00876084	21.3514	5.89539e-91	4.61378e-90	196.428
KEGG_TOLL_LIKE_RECEPTOR_SIGNALING_PATHWAY	0.221547	-0.00843994	20.4627	2.29634e-84	1.47622e-83	181.3
KEGG_GALACTOSE_METABOLISM	0.230475	0.00122399	23.0282	7.56563e-104	7.56563e-103	226.027
KEGG_OTHER_GLYCAN_DEGRADATION	0.231538	-0.0270535	16.392	1.24542e-56	4.67034e-56	117.675
KEGG_PHENYLALANINE_METABOLISM	0.236541	0.004789	18.3726	1.36046e-69	6.44428e-69	147.4
KEGG_HEMATOPOIETIC_CELL_LINEAGE	0.242486	-0.00665935	18.1801	2.75496e-68	1.27152e-67	144.403
KEGG_DNA_REPLICATION	0.244193	-0.0323592	14.3643	1.59181e-44	4.34131e-44	89.934
KEGG_CYTOKINE_CYTOKINE_RECEPTOR_INTERACTION	0.247487	-0.00860102	20.9401	6.96216e-88	4.81995e-87	189.375
KEGG_VIRAL_MYOCARDITIS	0.249534	-0.00308037	23.526	8.80694e-108	9.32499e-107	235.061
KEGG_LYSOSOME	0.250607	-0.0126703	23.9544	3.3255e-111	3.99059e-110	242.922
KEGG_PROTEIN_EXPORT	0.250829	0.0120242	17.485	1.18687e-63	5.0866e-63	133.773
KEGG_STARCH_AND_SUCROSE_METABOLISM	0.251128	-0.00144447	25.2942	4.06195e-122	6.64682e-121	267.987
KEGG_LEUKOCYTE_TRANSENDOTHELIAL_MIGRATION	0.253303	-0.00399233	27.7967	2.9271e-143	1.3172e-141	316.553
KEGG_GLYCOSAMINOGLYCAN_DEGRADATION	0.27336	-0.0225523	19.4146	7.97845e-77	4.1032e-76	163.993
KEGG_GLUTATHIONE_METABOLISM	0.278068	-0.00111481	25.8913	4.46164e-127	1.00387e-125	279.378
KEGG_TYPE_I_DIABETES_MELLITUS	0.285063	0.000287458	20.0926	1.13004e-81	6.78022e-81	175.121
KEGG_PRIMARY_IMMUNODEFICIENCY	0.285808	-0.0158721	19.4579	3.9393e-77	2.08551e-76	164.696
KEGG_PROTEASOME	0.304862	-0.0086673	19.7882	1.75421e-79	9.86742e-79	170.092
KEGG_MISMATCH_REPAIR	0.305219	-0.02858	19.5627	7.11851e-78	3.88282e-77	166.401
KEGG_ECM_RECEPTOR_INTERACTION	0.311703	-0.0133768	26.5206	2.3055e-132	5.92844e-131	291.522
KEGG_AMINO_SUGAR_AND_NUCLEOTIDE_SUGAR_METABOLISM	0.317846	-0.0174299	30.3662	7.95304e-166	4.77182e-164	368.398
KEGG_ASTHMA	0.320468	-0.00423477	18.1257	6.41945e-68	2.88875e-67	143.56
KEGG_LEISHMANIA_INFECTION	0.329087	-0.00755802	24.3936	9.52275e-115	1.31853e-113	251.059
KEGG_INTESTINAL_IMMUNE_NETWORK_FOR_IGA_PRODUCTION	0.331945	-0.00881519	21.214	6.31833e-90	4.73875e-89	194.063
KEGG_PATHOGENIC_ESCHERICHIA_COLI_INFECTION	0.333829	-0.00271785	33.0005	1.14397e-189	1.21333e-187	423.18
KEGG_ANTIGEN_PROCESSING_AND_PRESENTATION	0.338169	-0.00526926	25.4372	2.66733e-123	4.8012e-122	270.703
KEGG_GLYCOSAMINOGLYCAN_BIOSYNTHESIS_KERATAN_SULFATE	0.34017	-0.0114243	27.3838	1.04063e-139	3.12188e-138	308.396
KEGG_N_GLYCAN_BIOSYNTHESIS	0.342166	-0.0265577	32.9927	1.34815e-189	1.21333e-187	423.016
KEGG_COMPLEMENT_AND_COAGULATION_CASCADES	0.363546	-0.00617071	27.4062	6.6887e-140	2.40793e-138	308.837
KEGG_AUTOIMMUNE_THYROID_DISEASE	0.366494	-0.00960531	21.3877	3.14637e-91	2.5743e-90	197.054
KEGG_SYSTEMIC_LUPUS_ERYTHEMATOSUS	0.373215	-0.00435363	25.5361	4.0433e-124	8.08661e-123	272.585
KEGG_ALLOGRAFT_REJECTION	0.403804	-0.00889466	22.7414	1.33009e-101	1.26009e-100	220.872
KEGG_GRAFT_VERSUS_HOST_DISEASE	0.43736	-0.0100272	23.9666	2.653e-111	3.41099e-110	243.148
